# Supplementary material
Source: PubMed Central journal article supplement (PMC5020907)

## Genome-wide association of familial prostate cancer cases identifies evidence for a rare segregating haplotype at 8q24.21

Human Genetics

Authors:

Craig C. Teerlink\*,<sup>1</sup> Daniel Leongamornlert,<sup>2</sup> Tokhir Dadaev,<sup>2</sup> Alun Thomas,<sup>1</sup> James Farnham,<sup>1</sup> Robert A. Stephenson,<sup>3,4</sup> Shaun Riska,<sup>5</sup> Shannon K. McDonnell,<sup>5</sup> Daniel J. Schaid,<sup>5</sup> William J. Catalona,<sup>6</sup> S. Lilly Zheng,<sup>6</sup> Kathleen A. Cooney,<sup>7</sup> Anna M. Ray,<sup>7</sup> Kimberly A. Zuhlke,<sup>7</sup> Ethan M. Lange,<sup>8</sup> Graham G. Giles,<sup>9-11</sup> Melissa C. Southey,<sup>12</sup> Liesel M. Fitzgerald,<sup>9</sup> Antje Rinckleb,<sup>13</sup> Manuel Luedeke,<sup>13</sup> Christiane Maier,<sup>14</sup> Janet L. Stanford,<sup>15</sup> Elaine A. Ostrander,<sup>16</sup> Elina Kaikkonen,<sup>17</sup> Csilla Sipeky,<sup>17</sup> Teuvo Tammela,<sup>18</sup> Johanna Schleutker,<sup>19</sup> Kathleen E. Wiley,<sup>20</sup> Sarah D. Isaacs,<sup>20</sup> Patrick C. Walsh,<sup>20</sup> William B. Isaacs,<sup>20</sup> Jianfeng Xu,<sup>21</sup> Geraldine Cancel-Tassin,<sup>22</sup> Olivier Cussenot,<sup>22</sup> Diptasri Mandal,<sup>23</sup> Cecelia Laurie,<sup>24</sup> Cathy Laurie,<sup>24</sup>

International Consortium for Prostate Cancer Genetics, The PRACTICAL consortium,<sup>‡</sup> Stephen N. Thibodeau,<sup>25</sup> Ros Eeles,<sup>2</sup> Zsafia Kote-Jarai,<sup>2</sup> Lisa Cannon-Albright<sup>1,26</sup>

Affiliations:

<sup>1</sup> Department of Internal Medicine, University of Utah School of Medicine, Salt Lake City, UT, 84108, USA

<sup>2</sup> Division of Genetics and Epidemiology, Institute of Cancer Research, London, SW7 3RP, UK

<sup>3</sup> Departments of Urology and Surgery, University of Utah School of Medicine, Salt Lake City, UT, 84132, USA

<sup>4</sup> Huntsman Cancer Institute, University of Utah, Salt Lake City, UT, 84112, USA

<sup>5</sup> Department of Health Sciences Research, Mayo Clinic, Rochester, MN, 55905, USA

<sup>6</sup> Feinberg School of Medicine, Northwestern University, Chicago, IL, 60611, USA

<sup>7</sup> Departments of Internal Medicine and Urology, Department of Internal Medicine, University of Michigan Medical School, Ann Arbor, MI, 48109, USA

<sup>8</sup> Departments of Genetics and Biostatistics, University of North Carolina, Chapel Hill, NC, 27599, USA

<sup>9</sup> Cancer Epidemiology Centre, Cancer Council Victoria, Melbourne, 3004, Australia

<sup>10</sup> Centre for Epidemiology and Biostatistics, Melbourne School of Population and Global Health, University of Melbourne, Victoria, 3010, Australia

<sup>11</sup> Department of Epidemiology and Preventive Medicine, Monash University, Melbourne, Victoria, 3004, Australia

<sup>12</sup> Department of Pathology, University of Melbourne, Melbourne, 3010, Australia

<sup>13</sup> Department of Urology, University Hospital Ulm, Ulm, 53179, Germany

<sup>14</sup> Institute for Human Genetics, University of Ulm, Ulm, 89081, Germany

<sup>15</sup> Fred Hutchinson Cancer Research Center (FHRC), Division of Public Health Sciences, Seattle, WA, 98109, USA

<sup>16</sup> Cancer Genetics Branch, National Human Genome Research Institute (NHGRI), National Institutes of Health (NIH), Bethesda, MD, 20892, USA

<sup>17</sup> Department of Medical Biochemistry and Genetics, University of Turku, Turku, 20520, Finland

<sup>18</sup> Department of Urology, University of Tampere and Tampere University Hospital, Tampere, 33520, Finland

<sup>19</sup> Department of Medical Biochemistry and Genetics, University of Turku, and Tyks, Microbiology and Genetics, Department of Medical Genetics, Turku University Hospital, Turku, 20520, Finland

<sup>20</sup> Brady Urological Institute, Johns Hopkins University, Baltimore, MD, 21287, USA

<sup>21</sup> Program for Personalized Cancer Care, NorthShore University Health System, Evanston, IL, 60201, USA

<sup>22</sup> CeRePP, Hopital Tenon, Assistance Publique-Hopitaux de Paris, Paris, 75020, France

<sup>23</sup> Department of Genetics, Louisiana State University Health Sciences Center, New Orleans, LA, 70112, USA

<sup>24</sup> Department of Biostatistics, University of Washington, Seattle, WA, 98195, USA

<sup>25</sup> Department of Lab Medicine and Pathology, Mayo Clinic, Rochester, MN, 55905, USA

<sup>26</sup> George E. Wahlen Department of Veterans Affairs Medical Center, Salt Lake City, UT, 84148, USA

<sup>†</sup> Information of the consortium can be found at <http://practical.ccge.medschl.cam.ac.uk/>.

Members from the Prostate Cancer Association Group to Investigate Cancer Associated Alterations in the Genome (PRACTICAL) consortium are provided in the Supplemental Material.

Correspondence: [craig.teerlink@utah.edu](mailto:craig.teerlink@utah.edu)

**Supplemental Table 3.** Most frequent haplotype among carriers of the rare allele at rs138042437.

| Chromosome | Marker      | Position  | Allele_1 | Allele_2 | Frequency of Allele_1 | Presence of allele_2 on the haplotype (1=TRUE, 0=FALSE) |
|------------|-------------|-----------|----------|----------|-----------------------|---------------------------------------------------------|
| 8          | rs141692423 | 128094151 | TAGAA    | T        | 0.000376              | 0                                                       |
| 8          | rs144374205 | 128094286 | C        | T        | 0.000125              | 0                                                       |
| 8          | rs184232975 | 128094383 | A        | G        | 0.000627              | 0                                                       |
| 8          | rs6981122   | 128094460 | A        | C        | 0.589348              | 1                                                       |
| 8          | kgp5314987  | 128094483 | T        | G        | 0.589599              | 1                                                       |
| 8          | kgp28652058 | 128094577 | A        | G        | 0.003258              | 0                                                       |
| 8          | rs72725872  | 128094864 | G        | A        | 0.335213              | 1                                                       |
| 8          | rs115936719 | 128094887 | A        | G        | 0.000125              | 0                                                       |
| 8          | rs112708750 | 128094913 | A        | G        | 0.000627              | 0                                                       |
| 8          | rs76639131  | 128095006 | T        | C        | 0.000627              | 0                                                       |
| 8          | rs13252298  | 128095156 | A        | G        | 0.277569              | 0                                                       |
| 8          | kgp5872800  | 128095329 | G        | A        | 0.013283              | 0                                                       |
| 8          | rs142970406 | 128095343 | T        | G        | 0.000125              | 0                                                       |
| 8          | rs115773417 | 128095358 | T        | G        | 0.000376              | 0                                                       |
| 8          | rs114911018 | 128095813 | A        | G        | 0.000125              | 0                                                       |
| 8          | rs73705712  | 128095977 | A        | G        | 0.001128              | 0                                                       |
| 8          | rs74421890  | 128096183 | C        | T        | 0.000627              | 0                                                       |
| 8          | kgp28569603 | 128096289 | C        | T        | 0.00213               | 0                                                       |
| 8          | rs76111959  | 128096424 | C        | A        | 0.000627              | 0                                                       |
| 8          | rs77764845  | 128096442 | A        | G        | 0.000125              | 0                                                       |
| 8          | kgp6215045  | 128096477 | T        | G        | 0.238972              | 0                                                       |
| 8          | rs150645176 | 128096558 | G        | A        | 0.000877              | 0                                                       |
| 8          | kgp498405   | 128096564 | A        | G        | 0.006892              | 0                                                       |
| 8          | rs78004364  | 128097025 | T        | C        | 0.000376              | 0                                                       |
| 8          | rs60091013  | 128097315 | C        | T        | 0.000627              | 0                                                       |
| 8          | rs6997559   | 128097578 | C        | T        | 0.541103              | 1                                                       |
| 8          | rs111255075 | 128097619 | T        | A        | 0.000376              | 0                                                       |

|   |             |           |           |    |          |   |
|---|-------------|-----------|-----------|----|----------|---|
| 8 | rs138178617 | 128097731 | TC        | T  | 0.335088 | 1 |
| 8 | rs143007650 | 128097964 | A         | C  | 0.001128 | 0 |
| 8 | rs146659909 | 128098162 | C         | T  | 0.000752 | 0 |
| 8 | rs145342159 | 128098538 | G         | A  | 0.000125 | 0 |
| 8 | rs56311652  | 128098561 | T         | A  | 0.334712 | 1 |
| 8 | rs184126408 | 128098613 | C         | T  | 0.003383 | 0 |
| 8 | rs139756632 | 128098662 | .CAGCAGCT | A  | 0.01015  | 0 |
| 8 | rs55905282  | 128098838 | G         | A  | 0.336842 | 1 |
| 8 | rs138310587 | 128099139 | T         | G  | 0.007519 | 0 |
| 8 | kgp1741577  | 128099166 | C         | T  | 0.85614  | 1 |
| 8 | rs13257371  | 128099242 | C         | A  | 0.281704 | 0 |
| 8 | rs4571699   | 128099269 | A         | G  | 0.866541 | 1 |
| 8 | rs61262194  | 128099457 | CGTG      | C  | 0.867168 | 1 |
| 8 | rs7837848   | 128099532 | G         | T  | 0.188722 | 0 |
| 8 | rs61732842  | 128099535 | G         | A  | 0.000627 | 0 |
| 8 | rs59765225  | 128099765 | A         | G  | 0.001378 | 0 |
| 8 | rs11993508  | 128100076 | C         | T  | 0.867043 | 1 |
| 8 | rs17832021  | 128100176 | A         | T  | 0.337093 | 1 |
| 8 | rs28663168  | 128100409 | G         | A  | 0.19198  | 0 |
| 8 | rs181632659 | 128100429 | A         | G  | 0.000627 | 0 |
| 8 | rs56006726  | 128100439 | G         | C  | 0.000752 | 0 |
| 8 | kgp6794704  | 128100510 | G         | A  | 0.002506 | 0 |
| 8 | rs3857883   | 128100606 | G         | A  | 0.619048 | 1 |
| 8 | rs2392733   | 128100672 | C         | T  | 0.868672 | 1 |
| 8 | rs145376908 | 128100693 | TTTTTTTTT | G  | 0.334586 | 1 |
| 8 | rs77618639  | 128100801 | C         | T  | 0.000501 | 0 |
| 8 | rs1456316   | 128100848 | A         | T  | 0.619048 | 1 |
| 8 | kgp851223   | 128100925 | A         | G  | 0.01015  | 0 |
| 8 | rs28735726  | 128100929 | T         | C  | 0.000376 | 0 |
| 8 | kgp931577   | 128100964 | A         | G  | 0.336591 | 1 |
| 8 | rs9656814   | 128100977 | C         | T  | 0.336591 | 1 |
| 8 | rs9656815   | 128101003 | C         | T  | 0.335714 | 1 |
| 8 | rs191085113 | 128101246 | C         | T  | 0.001003 | 0 |
| 8 | rs74707848  | 128101277 | G         | A  | 0.000125 | 0 |
| 8 | rs10505484  | 128101312 | G         | A  | 0.335714 | 1 |
| 8 | rs62529913  | 128101331 | A         | G  | 0.619549 | 1 |
| 8 | rs11994653  | 128101343 | G         | A  | 0.619048 | 1 |
| 8 | kgp6347700  | 128101352 | C         | T  | 0.619048 | 1 |
| 8 | rs188002764 | 128101397 | A         | T  | 0.001253 | 0 |
| 8 | rs115642184 | 128101568 | A         | C  | 0.000125 | 0 |
| 8 | rs75414904  | 128101646 | C         | A  | 0.01015  | 0 |
| 8 | rs146678745 | 128101774 | G         | A  | 0.005263 | 0 |
| 8 | rs140213611 | 128101960 | G         | A  | 0.000251 | 0 |
| 8 | rs71298185  | 128102021 | C         | CT | 0.784211 | 1 |
| 8 | rs79935242  | 128102029 | A         | T  | 0.83208  | 1 |
| 8 | rs192806516 | 128102030 | A         | T  | 0.000501 | 0 |
| 8 | rs201592624 | 128102187 | GA        | G  | 0.000627 | 0 |

|   |                 |           |      |    |          |   |
|---|-----------------|-----------|------|----|----------|---|
| 8 | rs184980226     | 128102324 | C    | T  | 0.000125 | 0 |
| 8 | rs6470497       | 128102330 | T    | C  | 0.519674 | 0 |
| 8 | rs143783245     | 128102363 | A    | G  | 0.005764 | 0 |
| 8 | rs148134608     | 128102436 | G    | T  | 0.000376 | 0 |
| 8 | rs7844454       | 128102501 | T    | C  | 0.326316 | 0 |
| 8 | rs7826322       | 128102553 | A    | G  | 0.869048 | 1 |
| 8 | rs115605497     | 128102653 | T    | A  | 0.000501 | 0 |
| 8 | rs116200233     | 128102879 | C    | T  | 0.000501 | 0 |
| 8 | rs114778853     | 128102902 | C    | T  | 0.000376 | 0 |
| 8 | rs7000321       | 128103019 | A    | C  | 0.326441 | 0 |
| 8 | kgp20108723     | 128103151 | A    | G  | 0.0099   | 0 |
| 8 | rs117370686     | 128103217 | T    | C  | 0.000125 | 0 |
| 8 | rs7000967       | 128103360 | A    | G  | 0.530952 | 0 |
| 8 | rs148663063     | 128103520 | C    | T  | 0.000627 | 0 |
| 8 | rs72725876      | 128103635 | C    | T  | 0.450752 | 1 |
| 8 | rs7001895       | 128103679 | G    | C  | 0.462406 | 1 |
| 8 | rs146259474     | 128103742 | A    | G  | 0.000251 | 0 |
| 8 | rs181057649     | 128103880 | T    | C  | 0.000376 | 0 |
| 8 | exm-rs1456315   | 128103937 | T    | C  | 0.658897 | 1 |
| 8 | rs72725879      | 128103969 | C    | T  | 0.209649 | 0 |
| 8 | kgp9938326      | 128103979 | T    | C  | 0.197619 | 0 |
| 8 | rs185265591     | 128104043 | C    | T  | 0.000501 | 0 |
| 8 | kgp774037       | 128104055 | G    | T  | 0.274436 | 0 |
| 8 | rs183373024     | 128104117 | A    | G  | 0.016792 | 1 |
| 8 | rs78809737      | 128104218 | G    | A  | 0.043609 | 0 |
| 8 | rs13254738      | 128104343 | C    | A  | 0.662907 | 1 |
| 8 | rs7006390       | 128104367 | C    | T  | 0.009398 | 0 |
| 8 | rs118005113     | 128104745 | C    | A  | 0.014286 | 0 |
| 8 | rs73342295      | 128104821 | C    | T  | 0.001253 | 0 |
| 8 | rs144328514     | 128104875 | GT   | G  | 0.001253 | 0 |
| 8 | rs139118942     | 128104968 | G    | T  | 0.003383 | 0 |
| 8 | rs143971862     | 128105011 | G    | A  | 0.002256 | 0 |
| 8 | kgp20179886     | 128105031 | C    | T  | 0.001253 | 0 |
| 8 | rs1073997       | 128105187 | A    | C  | 0.051253 | 0 |
| 8 | rs147943597     | 128105201 | T    | TA | 0.001253 | 0 |
| 8 | rs146419022     | 128105241 | A    | C  | 0.000501 | 0 |
| 8 | rs73342301      | 128105259 | T    | A  | 0.001253 | 0 |
| 8 | rs73344303      | 128105267 | A    | C  | 0.001253 | 0 |
| 8 | rs112624731     | 128105488 | G    | A  | 0.001253 | 0 |
| 8 | rs115181583     | 128105562 | C    | T  | 0.000125 | 0 |
| 8 | rs73344305      | 128105567 | C    | A  | 0.001253 | 0 |
| 8 | rs7012407       | 128105593 | G    | T  | 0.000125 | 0 |
| 8 | rs199730016     | 128105666 | T    | TA | 0.021679 | 0 |
| 8 | rs57775023      | 128105672 | G    | A  | 0.29599  | 1 |
| 8 | rs200995559     | 128105678 | AAAT | A  | 0.001253 | 0 |
| 8 | hr8:128105679:l | 128105679 | AAT  | A  | 0.001253 | 0 |
| 8 | rs7012442       | 128105731 | C    | G  | 0.010401 | 0 |

|   |             |           |    |    |          |   |
|---|-------------|-----------|----|----|----------|---|
| 8 | rs180746465 | 128105967 | C  | T  | 0.000125 | 0 |
| 8 | rs7016828   | 128106232 | A  | T  | 0.051504 | 0 |
| 8 | rs7016830   | 128106235 | A  | G  | 0.051504 | 0 |
| 8 | rs73344314  | 128106337 | C  | T  | 0.001253 | 0 |
| 8 | rs115266272 | 128106397 | G  | A  | 0.000627 | 0 |
| 8 | rs186717005 | 128106495 | G  | A  | 0.001128 | 0 |
| 8 | kgp3432386  | 128106784 | T  | G  | 0.050251 | 0 |
| 8 | rs73705715  | 128106791 | A  | G  | 0.001253 | 0 |
| 8 | rs6983561   | 128106880 | A  | C  | 0.052381 | 0 |
| 8 | rs139318670 | 128106991 | A  | G  | 0.000251 | 0 |
| 8 | kgp1832940  | 128107018 | A  | C  | 0.007769 | 0 |
| 8 | rs16901948  | 128107101 | G  | A  | 0.050251 | 0 |
| 8 | rs1869931   | 128107136 | A  | G  | 0.265664 | 0 |
| 8 | rs16901949  | 128107153 | A  | C  | 0.050251 | 0 |
| 8 | rs60681470  | 128107192 | G  | A  | 0.052256 | 0 |
| 8 | rs16901950  | 128107243 | G  | A  | 0.050251 | 0 |
| 8 | rs16901952  | 128107270 | T  | C  | 0.050251 | 0 |
| 8 | rs58717512  | 128107381 | T  | A  | 0.050251 | 0 |
| 8 | kgp10140820 | 128107613 | C  | T  | 0.007393 | 0 |
| 8 | rs200238550 | 128107637 | AT | A  | 0.002506 | 0 |
| 8 | rs182475946 | 128107643 | T  | A  | 0.000251 | 0 |
| 8 | rs200390960 | 128107643 | T  | TA | 0.00188  | 0 |
| 8 | rs7005144   | 128107644 | T  | A  | 0.050251 | 0 |
| 8 | rs59786353  | 128107682 | A  | C  | 0.050251 | 0 |
| 8 | rs141915450 | 128107773 | C  | G  | 0.000501 | 0 |
| 8 | rs62531071  | 128108056 | T  | A  | 0.265664 | 0 |
| 8 | rs113924831 | 128108060 | G  | C  | 0.050251 | 0 |
| 8 | rs189077593 | 128108076 | T  | C  | 0.000877 | 0 |
| 8 | rs16901953  | 128108229 | T  | C  | 0.050376 | 0 |
| 8 | rs146278672 | 128108324 | C  | T  | 0.000627 | 0 |
| 8 | rs184239744 | 128108325 | G  | A  | 0.000125 | 0 |
| 8 | rs200603190 | 128108415 | G  | GT | 0.000877 | 0 |
| 8 | rs180983743 | 128108486 | C  | T  | 0.002632 | 0 |
| 8 | rs61622455  | 128108516 | T  | C  | 0.050376 | 0 |
| 8 | rs139449092 | 128108550 | C  | T  | 0.000125 | 0 |
| 8 | rs57435694  | 128108593 | T  | C  | 0.050376 | 0 |
| 8 | rs7010450   | 128108679 | T  | G  | 0.050376 | 0 |
| 8 | rs6990420   | 128108725 | C  | T  | 0.050376 | 0 |
| 8 | rs35365584  | 128108726 | G  | A  | 0.310652 | 0 |
| 8 | kgp28889278 | 128108774 | T  | C  | 0.000376 | 0 |
| 8 | rs6994359   | 128108923 | A  | G  | 0.318672 | 0 |
| 8 | rs17832285  | 128108993 | A  | G  | 0.172431 | 0 |
| 8 | rs7825340   | 128109129 | A  | G  | 0.204887 | 0 |
| 8 | rs116718240 | 128109172 | A  | G  | 0.000501 | 0 |
| 8 | rs12544977  | 128109287 | A  | G  | 0.685965 | 1 |
| 8 | rs73344342  | 128109356 | G  | A  | 0.050376 | 0 |
| 8 | rs80103808  | 128109431 | T  | C  | 0.046867 | 0 |

|   |             |           |    |   |          |   |
|---|-------------|-----------|----|---|----------|---|
| 8 | rs16901959  | 128109530 | A  | G | 0.050376 | 0 |
| 8 | rs7826337   | 128109574 | G  | A | 0.318421 | 0 |
| 8 | rs73348224  | 128109659 | A  | G | 0.000501 | 0 |
| 8 | rs7826388   | 128109776 | C  | T | 0.049248 | 0 |
| 8 | rs148609495 | 128109805 | T  | C | 0.000376 | 0 |
| 8 | rs7830341   | 128109930 | G  | A | 0.050376 | 0 |
| 8 | kgp20188654 | 128110187 | C  | T | 0.000251 | 0 |
| 8 | rs16901966  | 128110252 | A  | G | 0.050376 | 0 |
| 8 | rs16901967  | 128110277 | A  | G | 0.050376 | 0 |
| 8 | kgp9201401  | 128110402 | A  | G | 0.007393 | 0 |
| 8 | rs141885736 | 128110439 | A  | G | 0.000376 | 0 |
| 8 | kgp5611084  | 128110488 | T  | C | 0.009649 | 0 |
| 8 | rs7000910   | 128110605 | A  | T | 0.318546 | 0 |
| 8 | rs7001069   | 128110646 | A  | G | 0.050376 | 0 |
| 8 | rs114099351 | 128110665 | C  | G | 0.000627 | 0 |
| 8 | rs148316641 | 128110681 | T  | C | 0.000376 | 0 |
| 8 | rs142027152 | 128110721 | G  | T | 0.000125 | 0 |
| 8 | rs182829663 | 128110746 | G  | A | 0.003258 | 0 |
| 8 | kgp12026689 | 128110814 | A  | G | 0.047995 | 0 |
| 8 | rs190091637 | 128110875 | A  | G | 0.004386 | 0 |
| 8 | kgp6672517  | 128110896 | A  | G | 0.019048 | 0 |
| 8 | rs145488349 | 128110941 | G  | A | 0.008772 | 0 |
| 8 | rs11774449  | 128111032 | G  | T | 0.204261 | 0 |
| 8 | rs73348231  | 128111081 | C  | T | 0.001253 | 0 |
| 8 | rs138022229 | 128111133 | G  | A | 0.001128 | 0 |
| 8 | rs111728156 | 128111167 | T  | C | 0.001253 | 0 |
| 8 | rs7006076   | 128111238 | G  | A | 0.050376 | 0 |
| 8 | rs7005862   | 128111342 | A  | G | 0.052506 | 0 |
| 8 | rs7006251   | 128111343 | G  | A | 0.050376 | 0 |
| 8 | rs7006409   | 128111429 | G  | A | 0.685965 | 1 |
| 8 | rs6988257   | 128111456 | T  | C | 0.050376 | 0 |
| 8 | kgp870278   | 128111470 | C  | T | 0.050627 | 0 |
| 8 | rs114996033 | 128111715 | A  | T | 0.000877 | 0 |
| 8 | rs57010632  | 128111717 | A  | G | 0.052381 | 0 |
| 8 | rs190838606 | 128111786 | G  | A | 0.001754 | 0 |
| 8 | rs145109128 | 128111885 | T  | C | 0.000501 | 0 |
| 8 | rs202073575 | 128112009 | TG | T | 0.000627 | 0 |
| 8 | rs192300694 | 128112024 | T  | C | 0.002757 | 0 |
| 8 | rs16901969  | 128112097 | A  | C | 0.050376 | 0 |
| 8 | rs61442569  | 128112130 | C  | T | 0.001128 | 0 |
| 8 | rs73348241  | 128112179 | T  | A | 0.050376 | 0 |
| 8 | rs73348243  | 128112193 | T  | A | 0.050376 | 0 |
| 8 | rs61265543  | 128112446 | C  | T | 0.052381 | 0 |
| 8 | rs73348247  | 128112580 | A  | G | 0.001253 | 0 |
| 8 | rs16901970  | 128112715 | T  | G | 0.050376 | 0 |
| 8 | rs10453084  | 128112779 | G  | A | 0.050376 | 0 |
| 8 | rs6987723   | 128112859 | G  | A | 0.050376 | 0 |

|   |                 |           |      |    |          |   |
|---|-----------------|-----------|------|----|----------|---|
| 8 | kgp20291724     | 128112904 | G    | A  | 0.000501 | 0 |
| 8 | kgp4143475      | 128112976 | G    | A  | 0.023935 | 0 |
| 8 | rs115347242     | 128113025 | G    | A  | 0.000251 | 0 |
| 8 | rs6987640       | 128113028 | A    | T  | 0.050376 | 0 |
| 8 | rs151109347     | 128113200 | C    | T  | 0.000125 | 0 |
| 8 | rs150202293     | 128113262 | G    | A  | 0.001003 | 0 |
| 8 | rs145698299     | 128113333 | G    | T  | 0.000627 | 0 |
| 8 | rs56005245      | 128113426 | C    | T  | 0.22782  | 0 |
| 8 | rs74305597      | 128113464 | C    | T  | 0.050376 | 0 |
| 8 | kgp4380364      | 128113697 | C    | A  | 0.010276 | 0 |
| 8 | rs3956788       | 128113892 | A    | C  | 0.006767 | 0 |
| 8 | rs78511380      | 128114146 | T    | A  | 0.082707 | 0 |
| 8 | rs7824451       | 128114461 | C    | G  | 0.050376 | 0 |
| 8 | rs141330790     | 128114692 | G    | C  | 0.000251 | 0 |
| 8 | rs7824785       | 128114710 | C    | T  | 0.050627 | 0 |
| 8 | rs13268116      | 128114796 | G    | A  | 0.266291 | 0 |
| 8 | rs183186659     | 128115106 | C    | G  | 0.001378 | 0 |
| 8 | rs147663636     | 128115162 | TACA | T  | 0.001253 | 0 |
| 8 | rs73348257      | 128115259 | G    | A  | 0.050251 | 0 |
| 8 | rs75170735      | 128115378 | A    | G  | 0.046867 | 0 |
| 8 | rs193019252     | 128115468 | A    | T  | 0.001754 | 0 |
| 8 | rs114697590     | 128115511 | G    | A  | 0.000627 | 0 |
| 8 | rs6470498       | 128115720 | A    | G  | 0.050251 | 0 |
| 8 | rs1011829       | 128115743 | C    | A  | 0.514536 | 0 |
| 8 | rs6999725       | 128115752 | C    | T  | 0.048872 | 0 |
| 8 | rs116171948     | 128116390 | A    | G  | 0.000501 | 0 |
| 8 | rs28686871      | 128116480 | G    | T  | 0.196491 | 0 |
| 8 | rs1456306       | 128116500 | G    | A  | 0.26604  | 0 |
| 8 | rs114112019     | 128116617 | C    | A  | 0.000125 | 0 |
| 8 | rs13260084      | 128116830 | G    | A  | 0.266416 | 0 |
| 8 | rs141023590     | 128116888 | T    | C  | 0.000501 | 0 |
| 8 | rs115207770     | 128116947 | G    | A  | 0.000627 | 0 |
| 8 | rs57905629      | 128117151 | C    | G  | 0.001253 | 0 |
| 8 | kgp509399       | 128117314 | C    | T  | 0.000752 | 0 |
| 8 | rs137915695     | 128117339 | G    | T  | 0.000501 | 0 |
| 8 | rs60591498      | 128117504 | G    | A  | 0.001128 | 0 |
| 8 | rs143368544     | 128117736 | C    | T  | 0.014787 | 0 |
| 8 | kgp4757615      | 128117863 | C    | T  | 0.052256 | 0 |
| 8 | rs7827234       | 128118106 | T    | C  | 0.318672 | 0 |
| 8 | kgp20397658     | 128118637 | A    | G  | 0.000125 | 0 |
| 8 | rs73705721      | 128118812 | C    | T  | 0.001253 | 0 |
| 8 | rs7844219       | 128118815 | A    | G  | 0.052256 | 0 |
| 8 | chr8:128118925: | 128118925 | G    | GT | 0.001253 | 0 |
| 8 | rs6982324       | 128119056 | G    | C  | 0.050877 | 0 |
| 8 | rs190565485     | 128119215 | T    | C  | 0.000627 | 0 |
| 8 | rs10098867      | 128119257 | A    | G  | 0.20614  | 0 |
| 8 | rs141192401     | 128119347 | C    | T  | 0.000877 | 0 |

|   |                |           |   |     |          |   |
|---|----------------|-----------|---|-----|----------|---|
| 8 | rs150679216    | 128119350 | G | A   | 0.001128 | 0 |
| 8 | rs192962350    | 128119373 | C | T   | 0.000376 | 0 |
| 8 | rs189764742    | 128119543 | A | G   | 0.000125 | 0 |
| 8 | rs56974134     | 128119665 | G | C   | 0.001128 | 0 |
| 8 | rs140266678    | 128119887 | A | AAG | 0.052256 | 0 |
| 8 | rs139875989    | 128120090 | T | G   | 0.001253 | 0 |
| 8 | rs187359375    | 128120151 | C | T   | 0.050877 | 0 |
| 8 | rs192272500    | 128120185 | T | C   | 0.000125 | 0 |
| 8 | rs34425474     | 128120234 | T | C   | 0.051378 | 0 |
| 8 | rs146380714    | 128120261 | G | A   | 0.001253 | 0 |
| 8 | rs183595981    | 128120494 | T | C   | 0.001253 | 0 |
| 8 | rs7837051      | 128121849 | G | C   | 0.048872 | 0 |
| 8 | rs62531076     | 128121883 | A | G   | 0.011153 | 0 |
| 8 | rs78416342     | 128122364 | T | C   | 0.000627 | 0 |
| 8 | kgp5849686     | 128122422 | G | A   | 0.050376 | 0 |
| 8 | rs80105337     | 128122507 | C | T   | 0.000752 | 0 |
| 8 | kgp10302977    | 128122659 | C | T   | 0.049373 | 0 |
| 8 | rs116067414    | 128122660 | G | T   | 0.000251 | 0 |
| 8 | rs13259145     | 128122780 | A | G   | 0.365789 | 1 |
| 8 | rs138379185    | 128123369 | C | CA  | 0.001253 | 0 |
| 8 | rs6470499      | 128123394 | T | C   | 0.052256 | 0 |
| 8 | rs7842760      | 128123470 | G | A   | 0.052256 | 0 |
| 8 | rs71944294     | 128123830 | C | CA  | 0.052256 | 0 |
| 8 | kgp28902652    | 128123932 | A | G   | 0.00188  | 0 |
| 8 | rs114577106    | 128123941 | G | A   | 0.000251 | 0 |
| 8 | rs16901976     | 128124084 | C | G   | 0.000251 | 0 |
| 8 | rs1551512      | 128124126 | T | G   | 0.052256 | 0 |
| 8 | rs147010714    | 128124480 | A | G   | 0.000125 | 0 |
| 8 | rs184242289    | 128124851 | T | G   | 0.000251 | 0 |
| 8 | exm-rs16901979 | 128124916 | C | A   | 0.052256 | 0 |
| 8 | rs188623643    | 128125047 | G | A   | 0.000251 | 0 |
| 8 | rs10505483     | 128125195 | C | T   | 0.052381 | 0 |
| 8 | rs7817677      | 128125504 | A | G   | 0.050251 | 0 |
| 8 | kgp4929521     | 128125515 | C | T   | 0.012531 | 0 |
| 8 | rs144476044    | 128125657 | A | G   | 0.000501 | 0 |
| 8 | rs190559126    | 128125658 | C | G   | 0.003383 | 0 |
| 8 | rs148352370    | 128125777 | G | A   | 0.007519 | 0 |
| 8 | kgp683723      | 128125849 | A | G   | 0.267669 | 0 |
| 8 | rs190098812    | 128126221 | G | C   | 0.001378 | 0 |
| 8 | rs80222523     | 128126312 | C | T   | 0.000627 | 0 |
| 8 | rs115238595    | 128126452 | A | G   | 0.000627 | 0 |
| 8 | rs115890290    | 128126731 | C | T   | 0.000251 | 0 |
| 8 | rs76797182     | 128126781 | C | T   | 0.000125 | 0 |
| 8 | rs73350135     | 128126782 | G | A   | 0.001253 | 0 |
| 8 | rs73350138     | 128126798 | T | G   | 0.052381 | 0 |
| 8 | rs77295707     | 128126808 | G | T   | 0.000501 | 0 |
| 8 | rs74625407     | 128126908 | C | T   | 0.04198  | 0 |



|   |             |           |       |       |          |   |
|---|-------------|-----------|-------|-------|----------|---|
| 8 | kgp20524675 | 128127091 | T     | C     | 0.000627 | 0 |
| 8 | rs1456305   | 128127252 | G     | A     | 0.884461 | 1 |
| 8 | rs114938413 | 128127371 | A     | G     | 0.000627 | 0 |
| 8 | rs57615522  | 128127493 | A     | G     | 0.001128 | 0 |
| 8 | rs60081350  | 128127558 | C     | A     | 0.001253 | 0 |
| 8 | rs140490841 | 128127575 | GGTTT | G     | 0.051003 | 0 |
| 8 | rs192302396 | 128127579 | T     | G     | 0.000877 | 0 |
| 8 | rs58861013  | 128127804 | G     | T     | 0.001128 | 0 |
| 8 | rs72154702  | 128127819 | A     | AC    | 0.052381 | 0 |
| 8 | rs77080430  | 128128291 | C     | G     | 0.000251 | 0 |
| 8 | rs17184796  | 128128459 | G     | T     | 0.36792  | 1 |
| 8 | rs73705722  | 128128475 | A     | G     | 0.001128 | 0 |
| 8 | rs12678505  | 128128506 | C     | T     | 0.050376 | 0 |
| 8 | rs147609435 | 128128808 | C     | G     | 0.000251 | 0 |
| 8 | rs189236752 | 128129021 | G     | A     | 0.002882 | 0 |
| 8 | rs142719440 | 128129026 | G     | GTAA  | 0.000752 | 0 |
| 8 | rs16901983  | 128129042 | G     | T     | 0.019048 | 0 |
| 8 | rs73350143  | 128129250 | G     | C     | 0.001253 | 0 |
| 8 | rs73350145  | 128129269 | G     | A     | 0.001253 | 0 |
| 8 | rs140047721 | 128129312 | C     | G     | 0.009273 | 0 |
| 8 | rs73350150  | 128129345 | C     | A     | 0.001253 | 0 |
| 8 | kgp7883414  | 128129372 | T     | C     | 0.052381 | 0 |
| 8 | kgp498004   | 128129470 | C     | T     | 0.999749 | 1 |
| 8 | kgp20478808 | 128129475 | G     | T     | 0.000251 | 0 |
| 8 | rs150329920 | 128129571 | G     | A     | 0.000501 | 0 |
| 8 | rs78888127  | 128129587 | T     | C     | 0.000251 | 0 |
| 8 | rs181692082 | 128129630 | G     | A     | 0.002506 | 0 |
| 8 | rs114567577 | 128129808 | C     | T     | 0.000125 | 0 |
| 8 | rs149479434 | 128129826 | A     | G     | 0.000752 | 0 |
| 8 | rs145825537 | 128129968 | A     | G     | 0.000125 | 0 |
| 8 | rs149437660 | 128129985 | G     | GAATC | 0.052381 | 0 |
| 8 | rs190343889 | 128130064 | C     | T     | 0.002632 | 0 |
| 8 | rs71520631  | 128130142 | C     | T     | 0.000752 | 0 |
| 8 | rs76057855  | 128130281 | C     | G     | 0.000627 | 0 |
| 8 | rs143099984 | 128130351 | C     | T     | 0.000376 | 0 |
| 8 | rs7013255   | 128130487 | A     | G     | 0.052381 | 0 |
| 8 | rs60407771  | 128130590 | A     | G     | 0.000752 | 0 |
| 8 | rs150855038 | 128130647 | C     | G     | 0.072055 | 0 |
| 8 | rs117690356 | 128130714 | C     | T     | 0.074311 | 0 |
| 8 | kgp28574592 | 128130766 | C     | T     | 0.005764 | 0 |
| 8 | rs16901984  | 128130961 | T     | C     | 0.050376 | 0 |
| 8 | rs191030680 | 128131262 | G     | T     | 0.001003 | 0 |
| 8 | rs145446276 | 128131719 | A     | G     | 0.000125 | 0 |
| 8 | rs10098156  | 128131791 | C     | G     | 0.885088 | 1 |
| 8 | rs116041037 | 128131809 | G     | A     | 0.000627 | 0 |
| 8 | rs73350157  | 128131910 | G     | T     | 0.001253 | 0 |
| 8 | kgp9983635  | 128131916 | C     | T     | 0.037469 | 0 |

|   |             |           |   |   |          |   |
|---|-------------|-----------|---|---|----------|---|
| 8 | rs78312458  | 128132049 | A | G | 0.000125 | 0 |
| 8 | rs140464200 | 128132116 | G | A | 0.002757 | 0 |
| 8 | rs114159578 | 128132160 | C | T | 0.001378 | 0 |
| 8 | rs116427573 | 128132161 | A | G | 0.003634 | 0 |
| 8 | kgp6348096  | 128132324 | A | G | 0.267669 | 0 |
| 8 | rs79546618  | 128132447 | G | A | 0.000125 | 0 |
| 8 | rs73350160  | 128132689 | A | C | 0.001253 | 0 |
| 8 | rs181530208 | 128132859 | G | C | 0.000877 | 0 |
| 8 | kgp20237972 | 128132880 | A | G | 0.003634 | 0 |
| 8 | rs114601078 | 128132904 | C | G | 0.000251 | 0 |
| 8 | rs7000307   | 128133076 | A | G | 0.003634 | 0 |
| 8 | rs77525956  | 128133126 | G | A | 0.001003 | 0 |
| 8 | rs144661681 | 128133247 | G | A | 0.000627 | 0 |
| 8 | rs76589586  | 128133886 | T | C | 0.001504 | 0 |
| 8 | kgp11632834 | 128133909 | T | G | 0.018421 | 0 |
| 8 | rs16901985  | 128133977 | T | A | 0.022055 | 0 |
| 8 | rs73350165  | 128134049 | A | G | 0.001378 | 0 |
| 8 | rs34720002  | 128134117 | C | T | 0.265664 | 0 |
| 8 | rs142906123 | 128134319 | A | G | 0.000501 | 0 |
| 8 | rs185343692 | 128134360 | A | G | 0.000125 | 0 |
| 8 | rs116075424 | 128134375 | G | A | 0.000627 | 0 |
| 8 | rs183457026 | 128134439 | A | G | 0.000251 | 0 |
| 8 | rs79032495  | 128134570 | C | T | 0.000125 | 0 |
| 8 | kgp8059254  | 128134683 | T | C | 0.014912 | 0 |
| 8 | rs138925762 | 128134734 | A | G | 0.000627 | 0 |
| 8 | rs79815134  | 128135190 | C | T | 0.000627 | 0 |
| 8 | rs7840773   | 128135334 | G | T | 0.003634 | 0 |
| 8 | rs7824364   | 128135365 | T | C | 0.003634 | 0 |
| 8 | kgp2127375  | 128135560 | T | C | 0.073183 | 0 |
| 8 | rs80094171  | 128135569 | T | G | 0.003634 | 0 |
| 8 | rs79826465  | 128135593 | C | G | 0.015915 | 0 |
| 8 | rs143919265 | 128136318 | G | C | 0.000251 | 0 |
| 8 | rs147260239 | 128136322 | T | G | 0.000251 | 0 |
| 8 | rs58405015  | 128136566 | C | G | 0.001378 | 0 |
| 8 | rs116638944 | 128136694 | C | G | 0.001128 | 0 |
| 8 | rs73350173  | 128136728 | C | G | 0.003634 | 0 |
| 8 | rs79848460  | 128136746 | C | T | 0.001504 | 0 |
| 8 | rs74376318  | 128137318 | G | C | 0.001504 | 0 |
| 8 | rs114111380 | 128137544 | C | T | 0.000752 | 0 |
| 8 | rs114713022 | 128137585 | G | A | 0.000125 | 0 |
| 8 | rs7816535   | 128137668 | G | A | 0.196742 | 0 |
| 8 | kgp28669921 | 128137700 | T | C | 0.01604  | 0 |
| 8 | rs144912976 | 128138134 | G | C | 0.000627 | 0 |
| 8 | kgp12105139 | 128138163 | A | G | 0.011905 | 0 |
| 8 | kgp28671076 | 128138216 | T | C | 0.011153 | 0 |
| 8 | rs77209506  | 128138257 | C | T | 0.047494 | 0 |
| 8 | rs141357518 | 128138346 | A | G | 0.000376 | 0 |

|   |             |           |   |      |          |   |
|---|-------------|-----------|---|------|----------|---|
| 8 | rs16901988  | 128138560 | T | C    | 0.001378 | 0 |
| 8 | kgp3141672  | 128138703 | G | A    | 0.040727 | 0 |
| 8 | rs7821533   | 128138757 | G | A    | 0.000125 | 0 |
| 8 | rs7821299   | 128138781 | C | T    | 0.000125 | 0 |
| 8 | rs148350314 | 128139116 | T | C    | 0.000251 | 0 |
| 8 | rs114502542 | 128139855 | C | T    | 0.001754 | 0 |
| 8 | rs57877647  | 128140167 | G | T    | 0.001504 | 0 |
| 8 | rs191647937 | 128140448 | G | A    | 0.003008 | 0 |
| 8 | rs75949840  | 128140484 | G | C    | 0.045614 | 0 |
| 8 | rs139179471 | 128140719 | C | A    | 0.006266 | 0 |
| 8 | rs78689287  | 128140839 | A | G    | 0.000125 | 0 |
| 8 | rs142698271 | 128141645 | C | G    | 0.000125 | 0 |
| 8 | rs115342523 | 128141674 | A | C    | 0.000627 | 0 |
| 8 | rs116040182 | 128142007 | A | G    | 0.000627 | 0 |
| 8 | rs73350179  | 128142041 | C | G    | 0.001504 | 0 |
| 8 | rs73350182  | 128142048 | T | A    | 0.003634 | 0 |
| 8 | rs79229630  | 128142078 | G | C    | 0.000125 | 0 |
| 8 | rs150575875 | 128142339 | T | A    | 0.000125 | 0 |
| 8 | rs73350185  | 128142356 | A | G    | 0.001504 | 0 |
| 8 | rs117550530 | 128142360 | T | C    | 0.000125 | 0 |
| 8 | kgp1784502  | 128142400 | C | T    | 0.040727 | 0 |
| 8 | rs59825493  | 128142502 | T | A    | 0.003509 | 0 |
| 8 | rs143128811 | 128142786 | T | G    | 0.000501 | 0 |
| 8 | rs188590633 | 128143248 | C | T    | 0.000125 | 0 |
| 8 | rs146660330 | 128143759 | G | C    | 0.000752 | 0 |
| 8 | rs183745862 | 128143776 | G | T    | 0.002882 | 0 |
| 8 | rs113872918 | 128143892 | G | A    | 0.003634 | 0 |
| 8 | rs189289981 | 128143917 | G | A    | 0.003008 | 0 |
| 8 | rs12335235  | 128144114 | G | T    | 0.583208 | 0 |
| 8 | rs149902757 | 128144381 | A | G    | 0.000125 | 0 |
| 8 | rs145818225 | 128144418 | G | A    | 0.000125 | 0 |
| 8 | rs115149335 | 128144491 | G | C    | 0.002256 | 0 |
| 8 | rs114151985 | 128144803 | T | A    | 0.000125 | 0 |
| 8 | rs2124596   | 128145170 | G | A    | 0.954762 | 1 |
| 8 | rs2124595   | 128145235 | G | T    | 0.954762 | 1 |
| 8 | rs68171617  | 128145257 | T | C    | 0.370175 | 1 |
| 8 | rs116183034 | 128145316 | A | G    | 0.001128 | 0 |
| 8 | rs73352255  | 128145412 | T | C    | 0.003634 | 0 |
| 8 | rs115779814 | 128145611 | G | A    | 0.001253 | 0 |
| 8 | rs10111496  | 128145817 | A | C    | 0.254637 | 0 |
| 8 | rs73352256  | 128145910 | G | A    | 0.001504 | 0 |
| 8 | rs146427333 | 128146070 | T | A    | 0.000251 | 0 |
| 8 | rs141489233 | 128146198 | T | C    | 0.001003 | 0 |
| 8 | rs55768310  | 128146276 | G | GTTA | 0.96203  | 1 |
| 8 | rs10101884  | 128146308 | T | G    | 0.584586 | 0 |
| 8 | rs58460881  | 128146352 | C | T    | 0.002757 | 0 |
| 8 | rs114471276 | 128146476 | G | A    | 0.000501 | 0 |

|   |                  |           |     |          |          |   |
|---|------------------|-----------|-----|----------|----------|---|
| 8 | kgp451283        | 128146598 | G   | A        | 0.961153 | 1 |
| 8 | rs191809517      | 128146855 | C   | A        | 0.011529 | 0 |
| 8 | rs184690325      | 128146864 | C   | G        | 0.017544 | 0 |
| 8 | rs138035342      | 128146894 | G   | A        | 0.026692 | 0 |
| 8 | rs149502620      | 128147022 | G   | A        | 0.000627 | 0 |
| 8 | rs80317438       | 128147111 | T   | C        | 0.049875 | 1 |
| 8 | rs112631776      | 128147113 | G   | A        | 0.001003 | 0 |
| 8 | rs139989037      | 128147221 | C   | T        | 0.000251 | 0 |
| 8 | rs185837306      | 128147416 | G   | A        | 0.000376 | 0 |
| 8 | rs114937331      | 128147606 | T   | C        | 0.000251 | 0 |
| 8 | rs181261500      | 128147853 | A   | G        | 0.000125 | 0 |
| 8 | rs146195284      | 128147866 | A   | G        | 0.000125 | 0 |
| 8 | rs150950358      | 128148124 | C   | T        | 0.000125 | 0 |
| 8 | kgp11822588      | 128148610 | C   | T        | 0.050251 | 1 |
| 8 | kgp20233035      | 128148656 | A   | G        | 0.001253 | 0 |
| 8 | rs76984647       | 128148659 | C   | T        | 0.002005 | 0 |
| 8 | rs76588179       | 128149101 | G   | T        | 0.002005 | 0 |
| 8 | kgp4818018       | 128149517 | C   | T        | 0.32193  | 0 |
| 8 | rs114303996      | 128149608 | C   | G        | 0.000752 | 0 |
| 8 | rs143720358      | 128149827 | G   | A        | 0.000125 | 0 |
| 8 | rs6987409        | 128150161 | C   | T        | 0.002005 | 0 |
| 8 | rs79031580       | 128150280 | C   | T        | 0.002005 | 0 |
| 8 | rs144805473      | 128150513 | C   | A        | 0.006516 | 0 |
| 8 | rs77711360       | 128150623 | G   | A        | 0.002005 | 0 |
| 8 | rs17446747       | 128150652 | T   | C        | 0.378195 | 1 |
| 8 | rs76541294       | 128150812 | C   | T        | 0.002005 | 0 |
| 8 | rs200825818      | 128150864 | GT  | G        | 0.000627 | 0 |
| 8 | rs192542237      | 128150983 | G   | T        | 0.001629 | 0 |
| 8 | rs184535719      | 128150984 | G   | T        | 0.001629 | 0 |
| 8 | rs141862463      | 128151027 | T   | C        | 0.002005 | 0 |
| 8 | rs78267828       | 128151572 | G   | A        | 0.002005 | 0 |
| 8 | rs78552069       | 128151574 | T   | G        | 0.002005 | 0 |
| 8 | rs114978596      | 128151611 | G   | A        | 0.002005 | 0 |
| 8 | rs77262728       | 128151666 | A   | G        | 0.002005 | 0 |
| 8 | rs17446776       | 128151672 | C   | G        | 0.025564 | 0 |
| 8 | rs186470261      | 128151739 | G   | A        | 0.002005 | 0 |
| 8 | rs139051801      | 128151872 | G   | T        | 0.000376 | 0 |
| 8 | rs116494274      | 128152022 | T   | G        | 0.002005 | 0 |
| 8 | rs149449146      | 128152046 | T   | C        | 0.001003 | 0 |
| 8 | rs143866345      | 128152132 | T   | C        | 0.002005 | 0 |
| 8 | chr8:128152183:1 | 128152183 | TAA | T        | 0.002005 | 0 |
| 8 | chr8:128152184:  | 128152184 | A   | ATATATTT | 0.001754 | 0 |
| 8 | rs201590551      | 128152192 | T   | TTATATA  | 0.001378 | 0 |
| 8 | rs77526477       | 128152377 | G   | A        | 0.002005 | 0 |
| 8 | rs75499150       | 128152482 | T   | G        | 0.002005 | 0 |
| 8 | rs115726686      | 128152600 | G   | C        | 0.001253 | 0 |
| 8 | rs77757034       | 128152652 | C   | G        | 0.002005 | 0 |

|   |             |           |    |     |          |   |
|---|-------------|-----------|----|-----|----------|---|
| 8 | rs76477459  | 128152717 | A  | G   | 0.002005 | 0 |
| 8 | kgp20209140 | 128152869 | G  | A   | 0.001253 | 0 |
| 8 | rs76710266  | 128153004 | G  | A   | 0.002005 | 0 |
| 8 | rs78504346  | 128153026 | C  | T   | 0.002005 | 0 |
| 8 | rs116576283 | 128153090 | T  | C   | 0.002005 | 0 |
| 8 | rs80095353  | 128153143 | G  | A   | 0.002005 | 0 |
| 8 | rs139922671 | 128153155 | A  | ACT | 0.002005 | 0 |
| 8 | rs149063751 | 128153227 | AT | A   | 0.046867 | 0 |
| 8 | rs116481965 | 128153296 | G  | C   | 0.001253 | 0 |
| 8 | rs189657310 | 128153297 | G  | T   | 0.001629 | 0 |
| 8 | kgp10540377 | 128153320 | T  | C   | 0.050376 | 1 |
| 8 | rs77651557  | 128153358 | C  | T   | 0.002005 | 0 |
| 8 | rs140877535 | 128153452 | A  | C   | 0.000251 | 0 |
| 8 | rs76551862  | 128153465 | C  | T   | 0.001003 | 0 |
| 8 | rs76774156  | 128153533 | G  | C   | 0.002005 | 0 |
| 8 | rs73705724  | 128153556 | G  | A   | 0.002005 | 0 |
| 8 | rs78868267  | 128153621 | C  | A   | 0.002005 | 0 |
| 8 | rs80002533  | 128153662 | C  | T   | 0.002005 | 0 |
| 8 | rs201965154 | 128153727 | C  | CT  | 0.135714 | 0 |
| 8 | kgp11800676 | 128153805 | C  | T   | 0.136717 | 0 |
| 8 | rs7017820   | 128153873 | A  | G   | 0.000752 | 0 |
| 8 | rs7018238   | 128153881 | G  | A   | 0.002005 | 0 |
| 8 | rs7018243   | 128153891 | G  | A   | 0.002005 | 0 |
| 8 | rs145873481 | 128154152 | TG | T   | 0.002005 | 0 |
| 8 | rs78974498  | 128154373 | C  | T   | 0.001253 | 0 |
| 8 | rs77365928  | 128154400 | G  | A   | 0.000125 | 0 |
| 8 | rs75540569  | 128154490 | A  | T   | 0.002005 | 0 |
| 8 | rs77043583  | 128154509 | T  | C   | 0.002005 | 0 |
| 8 | rs150411791 | 128154517 | T  | C   | 0.000501 | 0 |
| 8 | rs78166514  | 128154535 | C  | T   | 0.002005 | 0 |
| 8 | rs79848565  | 128154581 | T  | C   | 0.002005 | 0 |
| 8 | rs74373229  | 128154748 | C  | G   | 0.002005 | 0 |
| 8 | rs76028786  | 128154943 | G  | A   | 0.002005 | 0 |
| 8 | rs60560825  | 128155002 | T  | C   | 0.003383 | 0 |
| 8 | kgp20608206 | 128155010 | G  | A   | 0.000877 | 0 |
| 8 | rs76051982  | 128155096 | A  | G   | 0.002005 | 0 |
| 8 | rs74849703  | 128155104 | C  | T   | 0.002005 | 0 |
| 8 | rs78304420  | 128155217 | G  | A   | 0.002005 | 0 |
| 8 | rs80125247  | 128155239 | C  | A   | 0.002005 | 0 |
| 8 | rs192900426 | 128155258 | G  | A   | 0.000376 | 0 |
| 8 | rs74772005  | 128155583 | G  | T   | 0.002005 | 0 |
| 8 | rs2466040   | 128155664 | T  | G   | 0.231328 | 0 |
| 8 | rs148070160 | 128155694 | T  | C   | 0.000752 | 0 |
| 8 | rs76610501  | 128155957 | T  | C   | 0.002005 | 0 |
| 8 | rs80335924  | 128156582 | C  | A   | 0.000627 | 0 |
| 8 | rs7822987   | 128156663 | G  | C   | 0.002005 | 0 |
| 8 | rs7822995   | 128156688 | G  | A   | 0.002005 | 0 |

|   |             |           |      |    |          |   |
|---|-------------|-----------|------|----|----------|---|
| 8 | rs73705729  | 128156782 | G    | A  | 0.002005 | 0 |
| 8 | rs115562065 | 128156799 | C    | T  | 0.000501 | 0 |
| 8 | rs144777255 | 128156800 | G    | A  | 0.011278 | 0 |
| 8 | rs114578686 | 128156849 | C    | T  | 0.000251 | 0 |
| 8 | rs76864653  | 128156885 | G    | T  | 0.002005 | 0 |
| 8 | rs116163586 | 128157097 | C    | T  | 0.001128 | 0 |
| 8 | rs77567702  | 128157274 | C    | A  | 0.002005 | 0 |
| 8 | rs56138850  | 128157375 | A    | C  | 0.000125 | 0 |
| 8 | rs189827118 | 128157533 | C    | T  | 0.003759 | 0 |
| 8 | rs76470748  | 128158157 | G    | A  | 0.002005 | 0 |
| 8 | rs73705732  | 128158160 | A    | G  | 0.000125 | 0 |
| 8 | rs143788032 | 128158208 | G    | GT | 0.076942 | 0 |
| 8 | kgp20113143 | 128158252 | C    | A  | 0.001253 | 0 |
| 8 | rs2516280   | 128158455 | C    | A  | 0.961028 | 1 |
| 8 | rs146806683 | 128158503 | A    | G  | 0.000125 | 0 |
| 8 | rs115894212 | 128158511 | G    | A  | 0.000627 | 0 |
| 8 | rs140601347 | 128158601 | T    | C  | 0.000501 | 0 |
| 8 | rs150238719 | 128158659 | CT   | C  | 0.001253 | 0 |
| 8 | rs73705733  | 128158766 | A    | G  | 0.000125 | 0 |
| 8 | rs76927191  | 128158835 | C    | T  | 0.046867 | 0 |
| 8 | rs187018917 | 128159084 | A    | T  | 0.002882 | 0 |
| 8 | rs77509923  | 128159232 | A    | G  | 0.000125 | 0 |
| 8 | rs73352268  | 128159326 | C    | T  | 0.003383 | 0 |
| 8 | rs3100857   | 128159432 | T    | C  | 0.398747 | 0 |
| 8 | rs191386901 | 128159436 | T    | C  | 0.002506 | 0 |
| 8 | rs182184789 | 128159440 | T    | C  | 0.001629 | 0 |
| 8 | rs187907086 | 128159529 | G    | A  | 0.001253 | 0 |
| 8 | rs143680494 | 128159857 | CTAT | C  | 0.000627 | 0 |
| 8 | kgp9248011  | 128160055 | G    | A  | 0.192857 | 0 |
| 8 | rs55934446  | 128160174 | T    | C  | 0.002005 | 0 |
| 8 | rs147382088 | 128160202 | T    | A  | 0.000376 | 0 |
| 8 | rs116057702 | 128160431 | A    | C  | 0.000752 | 0 |
| 8 | kgp1913700  | 128160801 | C    | T  | 0.018421 | 0 |
| 8 | rs150890460 | 128160808 | G    | A  | 0.000125 | 0 |
| 8 | rs111754493 | 128161058 | T    | C  | 0.000251 | 0 |
| 8 | rs115608784 | 128161124 | A    | G  | 0.001003 | 0 |
| 8 | rs116145447 | 128161152 | G    | A  | 0.001003 | 0 |
| 8 | rs79721800  | 128161225 | G    | A  | 0.002005 | 0 |
| 8 | rs60046410  | 128161469 | G    | A  | 0.001378 | 0 |
| 8 | rs189023075 | 128161509 | T    | C  | 0.002005 | 0 |
| 8 | rs2392724   | 128161536 | C    | T  | 0.521429 | 0 |
| 8 | rs57638440  | 128161605 | G    | A  | 0.001378 | 0 |
| 8 | rs36021065  | 128161611 | C    | A  | 0.02995  | 0 |
| 8 | rs2392725   | 128161628 | C    | T  | 0.519549 | 0 |
| 8 | rs142867847 | 128161629 | G    | A  | 0.007644 | 0 |
| 8 | rs2893602   | 128161653 | C    | T  | 0.13609  | 0 |
| 8 | rs58642622  | 128161670 | ACT  | A  | 0.433333 | 1 |

|   |             |           |       |     |          |   |
|---|-------------|-----------|-------|-----|----------|---|
| 8 | rs199728442 | 128161673 | CTG   | C   | 0.432581 | 1 |
| 8 | rs115705407 | 128161740 | G     | A   | 0.000627 | 0 |
| 8 | rs2445605   | 128161944 | T     | C   | 0.958897 | 1 |
| 8 | rs150171972 | 128162016 | G     | T   | 0.000125 | 0 |
| 8 | kgp1944129  | 128162025 | C     | T   | 0.017794 | 0 |
| 8 | kgp12452367 | 128162026 | G     | A   | 0.014411 | 0 |
| 8 | rs143057604 | 128162272 | T     | A   | 0.000251 | 0 |
| 8 | rs76636367  | 128162547 | G     | C   | 0.002005 | 0 |
| 8 | kgp20122333 | 128162574 | T     | C   | 0.000752 | 0 |
| 8 | kgp10004022 | 128162720 | C     | T   | 0.014912 | 0 |
| 8 | rs17446916  | 128162974 | C     | T   | 0.433333 | 1 |
| 8 | kgp28942228 | 128163174 | A     | G   | 0.001629 | 0 |
| 8 | rs188716223 | 128163204 | T     | C   | 0.003133 | 0 |
| 8 | rs116238651 | 128163526 | C     | T   | 0.000251 | 0 |
| 8 | kgp20291991 | 128163570 | T     | C   | 0.000501 | 0 |
| 8 | rs3037747   | 128163649 | G     | GCA | 0.957644 | 1 |
| 8 | kgp1394077  | 128163803 | G     | A   | 0.016541 | 0 |
| 8 | rs79215232  | 128164243 | A     | G   | 0.000125 | 0 |
| 8 | rs78329357  | 128164695 | C     | T   | 0.000125 | 0 |
| 8 | kgp28781054 | 128164844 | A     | G   | 0.005639 | 0 |
| 8 | kgp9285398  | 128165076 | T     | C   | 0.001003 | 0 |
| 8 | kgp20413984 | 128165558 | T     | C   | 0.001003 | 0 |
| 8 | rs114983938 | 128165677 | C     | T   | 0.001003 | 0 |
| 8 | rs181263489 | 128165729 | T     | C   | 0.005639 | 0 |
| 8 | rs13275200  | 128166556 | G     | A   | 0.43208  | 1 |
| 8 | rs75640309  | 128166710 | C     | T   | 0.001629 | 0 |
| 8 | kgp3121234  | 128167147 | A     | G   | 0.046992 | 0 |
| 8 | rs142258029 | 128167343 | A     | T   | 0.000501 | 0 |
| 8 | rs146380832 | 128167551 | G     | A   | 0.000627 | 0 |
| 8 | rs201883080 | 128167659 | GCTAA | G   | 0.010777 | 0 |
| 8 | rs114682375 | 128167828 | A     | G   | 0.000251 | 0 |
| 8 | rs149797428 | 128168596 | A     | G   | 0.002882 | 0 |
| 8 | rs62531085  | 128168627 | C     | T   | 0.014787 | 0 |
| 8 | rs117032061 | 128168628 | G     | A   | 0.000251 | 0 |
| 8 | rs147834391 | 128168980 | G     | A   | 0.02807  | 0 |
| 8 | rs199883565 | 128169215 | G     | GA  | 0.000125 | 0 |
| 8 | rs145298679 | 128169266 | C     | G   | 0.000125 | 0 |
| 8 | rs116146766 | 128169317 | C     | T   | 0.045614 | 0 |
| 8 | rs115294184 | 128169322 | C     | T   | 0.045614 | 0 |
| 8 | rs116719898 | 128169327 | C     | T   | 0.000752 | 0 |
| 8 | rs13269873  | 128169609 | G     | A   | 0.000627 | 0 |
| 8 | rs181484758 | 128169623 | C     | G   | 0.001128 | 0 |
| 8 | rs10111439  | 128169857 | A     | G   | 0.000627 | 0 |
| 8 | rs151142881 | 128170146 | G     | A   | 0.000752 | 0 |
| 8 | kgp11561458 | 128170250 | C     | T   | 0.052381 | 0 |
| 8 | rs75914071  | 128170350 | T     | C   | 0.000125 | 0 |
| 8 | rs140239022 | 128170424 | A     | G   | 0.000251 | 0 |

|   |             |           |   |   |          |   |
|---|-------------|-----------|---|---|----------|---|
| 8 | rs16901996  | 128170524 | T | G | 0.001754 | 0 |
| 8 | rs73705739  | 128170559 | T | C | 0.000125 | 0 |
| 8 | rs114296334 | 128170563 | G | T | 0.000125 | 0 |
| 8 | rs74720733  | 128170668 | G | T | 0.000125 | 0 |
| 8 | rs113349229 | 128170815 | G | A | 0.000376 | 0 |
| 8 | rs1378900   | 128171018 | T | C | 0.9599   | 1 |
| 8 | kgp20362410 | 128171372 | C | T | 0.000251 | 0 |
| 8 | rs73352276  | 128171703 | C | T | 0.000251 | 0 |
| 8 | rs7006636   | 128171790 | G | A | 0.33183  | 0 |
| 8 | rs35636249  | 128172005 | T | G | 0.000501 | 0 |
| 8 | rs7002343   | 128172028 | T | C | 0.345363 | 0 |
| 8 | rs73705740  | 128172072 | T | G | 0.021679 | 0 |
| 8 | rs116952717 | 128172155 | T | A | 0.000125 | 0 |
| 8 | rs183064432 | 128172209 | G | A | 0.000376 | 0 |
| 8 | rs76353652  | 128172372 | A | C | 0.000376 | 0 |
| 8 | rs11994992  | 128172382 | G | A | 0.012782 | 0 |
| 8 | rs147470989 | 128172474 | A | C | 0.002632 | 0 |
| 8 | rs114149921 | 128172526 | G | A | 0.000125 | 0 |
| 8 | rs145263367 | 128172574 | C | G | 0.000251 | 0 |
| 8 | rs80335375  | 128172653 | C | G | 0.002005 | 0 |
| 8 | rs2124600   | 128172686 | T | C | 0.35614  | 0 |
| 8 | kgp6770865  | 128172764 | C | T | 0.008647 | 0 |
| 8 | rs192288756 | 128172790 | C | T | 0.000251 | 0 |
| 8 | rs78586469  | 128173110 | G | A | 0.000251 | 0 |
| 8 | kgp20269534 | 128173149 | A | G | 0.001128 | 0 |
| 8 | rs60552231  | 128173201 | G | A | 0.011529 | 0 |
| 8 | rs149743515 | 128173206 | G | A | 0.004261 | 0 |
| 8 | rs117678645 | 128173272 | A | G | 0.007018 | 0 |
| 8 | rs115289505 | 128173716 | T | C | 0.000627 | 0 |
| 8 | rs114037353 | 128173773 | G | T | 0.001253 | 0 |
| 8 | kgp8843744  | 128173932 | A | G | 0.021805 | 0 |
| 8 | kgp10204582 | 128174295 | G | T | 0.19812  | 1 |
| 8 | kgp9380476  | 128174699 | A | C | 0.011654 | 0 |
| 8 | rs72725897  | 128174810 | G | A | 0.318045 | 0 |
| 8 | rs55837417  | 128174939 | A | T | 0.011654 | 0 |
| 8 | rs180830668 | 128175078 | A | G | 0.000877 | 0 |
| 8 | kgp3161023  | 128175199 | G | T | 0.008145 | 0 |
| 8 | kgp2573404  | 128175538 | C | T | 0.101378 | 1 |
| 8 | kgp461730   | 128175696 | G | A | 0.662531 | 0 |
| 8 | rs16902001  | 128175867 | A | G | 0.002882 | 0 |
| 8 | rs74931384  | 128175917 | C | A | 0.000125 | 0 |
| 8 | rs59180736  | 128176054 | G | C | 0.011654 | 0 |
| 8 | kgp20620307 | 128176151 | C | T | 0.000501 | 0 |
| 8 | rs138723226 | 128176393 | G | A | 0.000125 | 0 |
| 8 | rs34392502  | 128176477 | C | T | 0.000251 | 0 |
| 8 | rs76797740  | 128176513 | C | G | 0.000627 | 0 |
| 8 | rs114767037 | 128176597 | C | A | 0.000125 | 0 |



|   |             |           |           |    |          |   |
|---|-------------|-----------|-----------|----|----------|---|
| 8 | rs74927314  | 128176753 | T         | A  | 0.000251 | 0 |
| 8 | rs35626935  | 128176772 | C         | T  | 0.000251 | 0 |
| 8 | rs35560924  | 128176793 | G         | T  | 0.000251 | 0 |
| 8 | rs76784613  | 128176963 | A         | G  | 0.000752 | 0 |
| 8 | rs1456311   | 128177298 | G         | T  | 0.663784 | 0 |
| 8 | rs28396952  | 128177392 | G         | A  | 0.000501 | 0 |
| 8 | rs111650540 | 128177520 | C         | G  | 0.001754 | 0 |
| 8 | rs148654310 | 128177680 | C         | T  | 0.001253 | 0 |
| 8 | rs113687860 | 128177717 | T         | C  | 0.001128 | 0 |
| 8 | rs200763513 | 128177717 | TTC       | T  | 0.280576 | 0 |
| 8 | rs199656064 | 128177730 | TCTC      | T  | 0.003133 | 0 |
| 8 | rs200609769 | 128177735 | CTTTTTTTT | C  | 0.012531 | 0 |
| 8 | rs142223582 | 128177771 | C         | T  | 0.000376 | 0 |
| 8 | rs111282431 | 128177808 | G         | C  | 0.010777 | 0 |
| 8 | rs139046764 | 128177812 | G         | A  | 0.016541 | 0 |
| 8 | rs186948306 | 128177867 | G         | A  | 0.02782  | 0 |
| 8 | rs189821298 | 128177881 | T         | C  | 0.000376 | 0 |
| 8 | rs182196803 | 128177909 | C         | T  | 0.001253 | 0 |
| 8 | rs66759748  | 128177923 | A         | AT | 0.400376 | 0 |
| 8 | rs1186405   | 128177933 | G         | C  | 0.400627 | 0 |
| 8 | rs146415591 | 128178006 | C         | T  | 0.000877 | 0 |
| 8 | kgp6027914  | 128178291 | G         | A  | 0.078947 | 0 |
| 8 | rs77646139  | 128178330 | T         | A  | 0.000627 | 0 |
| 8 | rs139890247 | 128178411 | C         | T  | 0.000627 | 0 |
| 8 | rs143258416 | 128178449 | A         | C  | 0.000125 | 0 |
| 8 | rs116174955 | 128178521 | C         | G  | 0.000376 | 0 |
| 8 | rs2445606   | 128178647 | T         | C  | 0.402005 | 0 |
| 8 | rs145357444 | 128178665 | C         | T  | 0.000251 | 0 |
| 8 | rs10481166  | 128178685 | G         | A  | 0.399624 | 0 |
| 8 | rs149178961 | 128178711 | A         | G  | 0.00589  | 0 |
| 8 | rs73335511  | 128179268 | T         | C  | 0.001003 | 0 |
| 8 | rs6981995   | 128179304 | A         | G  | 0.001128 | 0 |
| 8 | rs181007781 | 128179383 | C         | T  | 0.000125 | 0 |
| 8 | rs79181303  | 128179578 | G         | C  | 0.018672 | 0 |
| 8 | rs2445607   | 128179631 | G         | A  | 0.401003 | 0 |
| 8 | rs2456456   | 128179876 | A         | G  | 0.666792 | 0 |
| 8 | rs1605260   | 128180133 | T         | C  | 0.000251 | 0 |
| 8 | rs116494606 | 128180138 | C         | T  | 0.000251 | 0 |
| 8 | rs138603869 | 128180178 | T         | G  | 0.000251 | 0 |
| 8 | rs71520634  | 128180444 | G         | A  | 0.016291 | 0 |
| 8 | rs116087835 | 128180580 | T         | C  | 0.000251 | 0 |
| 8 | rs36118672  | 128180872 | GC        | G  | 0.396241 | 0 |
| 8 | rs2456457   | 128180908 | T         | A  | 0.395363 | 0 |
| 8 | rs76982760  | 128180943 | G         | C  | 0.000376 | 0 |
| 8 | rs185654871 | 128181086 | C         | T  | 0.000125 | 0 |
| 8 | rs35112273  | 128181139 | G         | A  | 0.000251 | 0 |
| 8 | rs145951075 | 128181296 | C         | A  | 0.000251 | 0 |

|   |             |           |     |   |          |   |
|---|-------------|-----------|-----|---|----------|---|
| 8 | rs2445608   | 128181302 | G   | A | 0.394862 | 0 |
| 8 | kgp5322993  | 128181435 | A   | G | 0.255639 | 0 |
| 8 | kgp7562221  | 128181479 | T   | C | 0.396115 | 0 |
| 8 | kgp20219251 | 128181694 | T   | C | 0.01203  | 0 |
| 8 | rs13266271  | 128181807 | C   | T | 0.099749 | 1 |
| 8 | kgp11486107 | 128181903 | T   | G | 0.398747 | 0 |
| 8 | rs16902002  | 128182083 | C   | G | 0.00401  | 0 |
| 8 | rs2456461   | 128182451 | A   | G | 0.398496 | 0 |
| 8 | kgp8291078  | 128182520 | G   | A | 0.020677 | 0 |
| 8 | rs13439599  | 128182763 | C   | T | 0.016667 | 0 |
| 8 | rs76865301  | 128182793 | G   | A | 0.044987 | 0 |
| 8 | rs114930320 | 128182835 | T   | A | 0.000251 | 0 |
| 8 | rs117313401 | 128182885 | T   | A | 0.010025 | 0 |
| 8 | rs78067194  | 128183005 | T   | C | 0.000251 | 0 |
| 8 | rs73705744  | 128183077 | G   | T | 0.001378 | 0 |
| 8 | rs111705620 | 128183112 | T   | C | 0.001754 | 0 |
| 8 | rs2466021   | 128183187 | C   | G | 0.383333 | 0 |
| 8 | rs34691155  | 128183214 | A   | G | 0.000251 | 0 |
| 8 | kgp20573775 | 128183225 | C   | T | 0.000627 | 0 |
| 8 | rs192964814 | 128183583 | A   | G | 0.000877 | 0 |
| 8 | rs111365649 | 128183598 | A   | G | 0.001754 | 0 |
| 8 | rs111806098 | 128183641 | G   | A | 0.016667 | 0 |
| 8 | rs2466022   | 128183646 | T   | A | 0.382206 | 0 |
| 8 | rs114981698 | 128183692 | G   | A | 0.000125 | 0 |
| 8 | rs148333139 | 128183771 | G   | A | 0.005013 | 0 |
| 8 | rs187375437 | 128183778 | G   | A | 0.000251 | 0 |
| 8 | rs191785584 | 128183871 | A   | G | 0.037719 | 0 |
| 8 | rs112086682 | 128183879 | G   | A | 0.001754 | 0 |
| 8 | rs2034859   | 128183918 | T   | C | 0.854511 | 1 |
| 8 | rs113183806 | 128184017 | T   | C | 0.005263 | 0 |
| 8 | rs13262596  | 128184035 | C   | T | 0.000251 | 0 |
| 8 | rs139604316 | 128184079 | CAT | C | 0.001754 | 0 |
| 8 | rs79876094  | 128184117 | G   | A | 0.001754 | 0 |
| 8 | rs74523657  | 128184139 | G   | C | 0.000376 | 0 |
| 8 | rs142671530 | 128184176 | T   | C | 0.000125 | 0 |
| 8 | kgp20614873 | 128184258 | C   | T | 0.00188  | 0 |
| 8 | rs13263238  | 128184295 | C   | T | 0.003634 | 0 |
| 8 | rs116787464 | 128184364 | A   | G | 0.000251 | 0 |
| 8 | rs117962197 | 128184457 | T   | C | 0.000251 | 0 |
| 8 | rs71520635  | 128184700 | A   | G | 0.000251 | 0 |
| 8 | rs114167865 | 128184817 | T   | C | 0.001754 | 0 |
| 8 | rs61056137  | 128184979 | G   | A | 0.001128 | 0 |
| 8 | rs76524631  | 128185091 | C   | T | 0.001754 | 0 |
| 8 | rs1551509   | 128185142 | G   | T | 0.000125 | 0 |
| 8 | rs74447060  | 128185152 | G   | C | 0.001754 | 0 |
| 8 | rs60955457  | 128185548 | G   | A | 0.000752 | 0 |
| 8 | kgp20191311 | 128185641 | T   | C | 0.000125 | 0 |

|   |             |           |       |           |          |   |
|---|-------------|-----------|-------|-----------|----------|---|
| 8 | rs79666923  | 128185734 | C     | A         | 0.001754 | 0 |
| 8 | rs139280292 | 128185837 | TACAC | T         | 0.381328 | 0 |
| 8 | rs74771179  | 128185865 | G     | T         | 0.001754 | 0 |
| 8 | rs78248265  | 128185886 | T     | G         | 0.001754 | 0 |
| 8 | rs111521532 | 128185998 | G     | T         | 0.001754 | 0 |
| 8 | rs200650202 | 128186005 | AG    | A         | 0.000251 | 0 |
| 8 | rs114715051 | 128186015 | G     | C         | 0.001754 | 0 |
| 8 | kgp20165970 | 128186020 | T     | C         | 0.00188  | 0 |
| 8 | rs76534506  | 128186357 | A     | G         | 0.001754 | 0 |
| 8 | kgp20188062 | 128186421 | A     | G         | 0.00188  | 0 |
| 8 | kgp11693324 | 128186437 | C     | T         | 0.004261 | 0 |
| 8 | rs115705053 | 128186560 | A     | G         | 0.000251 | 0 |
| 8 | kgp20143191 | 128186569 | A     | G         | 0.00188  | 0 |
| 8 | rs114712190 | 128186617 | A     | C         | 0.001754 | 0 |
| 8 | rs76922981  | 128186838 | C     | T         | 0.001754 | 0 |
| 8 | rs77462299  | 128186941 | T     | C         | 0.001754 | 0 |
| 8 | rs28557055  | 128187046 | G     | C         | 0.001128 | 0 |
| 8 | rs74346166  | 128187051 | G     | A         | 0.000251 | 0 |
| 8 | rs111599679 | 128187054 | G     | GA        | 0.001754 | 0 |
| 8 | rs192319070 | 128187076 | C     | T         | 0.001128 | 0 |
| 8 | rs62531100  | 128187172 | T     | C         | 0.016291 | 0 |
| 8 | rs113230055 | 128187218 | C     | A         | 0.001754 | 0 |
| 8 | rs73705746  | 128187232 | G     | C         | 0.001378 | 0 |
| 8 | rs111945483 | 128187310 | C     | T         | 0.001754 | 0 |
| 8 | rs115892957 | 128187434 | A     | G         | 0.000125 | 0 |
| 8 | rs113300371 | 128187501 | CCA   | C         | 0.001629 | 0 |
| 8 | rs71303487  | 128187579 | A     | ACACACATA | 0.393734 | 0 |
| 8 | rs112931223 | 128187642 | C     | G         | 0.001754 | 0 |
| 8 | rs80181041  | 128187662 | C     | G         | 0.002005 | 0 |
| 8 | rs61622813  | 128187704 | A     | T         | 0.001378 | 0 |
| 8 | rs13258906  | 128187712 | A     | G         | 0.000251 | 0 |
| 8 | kgp20129366 | 128187736 | G     | A         | 0.00188  | 0 |
| 8 | rs10282925  | 128187993 | G     | C         | 0.001128 | 0 |
| 8 | rs2466024   | 128188019 | G     | A         | 0.397995 | 0 |
| 8 | rs16902003  | 128188055 | T     | C         | 0.001378 | 0 |
| 8 | rs73705747  | 128188096 | T     | C         | 0.011905 | 0 |
| 8 | rs16902004  | 128188100 | T     | A         | 0.000125 | 0 |
| 8 | rs80214879  | 128188104 | C     | T         | 0.001253 | 0 |
| 8 | rs2456447   | 128188198 | C     | G         | 0.397995 | 0 |
| 8 | rs79841772  | 128188846 | C     | T         | 0.001754 | 0 |
| 8 | rs114203625 | 128188905 | G     | A         | 0.001754 | 0 |
| 8 | rs140102190 | 128189145 | G     | C         | 0.008897 | 0 |
| 8 | rs78260731  | 128189289 | T     | A         | 0.000501 | 0 |
| 8 | rs2466025   | 128189374 | C     | G         | 0.382206 | 0 |
| 8 | kgp28814597 | 128189510 | T     | C         | 0.016416 | 0 |
| 8 | kgp20586929 | 128189610 | T     | C         | 0.000501 | 0 |
| 8 | rs79195649  | 128190255 | G     | A         | 0.001504 | 0 |

|   |               |           |   |    |          |   |
|---|---------------|-----------|---|----|----------|---|
| 8 | rs79659537    | 128190323 | A | T  | 0.000376 | 0 |
| 8 | rs78276389    | 128190358 | G | A  | 0.044361 | 0 |
| 8 | rs113759668   | 128190493 | T | C  | 0.001504 | 0 |
| 8 | rs113936308   | 128190795 | T | G  | 0.001504 | 0 |
| 8 | rs113242945   | 128191188 | T | C  | 0.001504 | 0 |
| 8 | rs76168340    | 128191237 | A | G  | 0.001378 | 0 |
| 8 | kgp5483864    | 128191320 | A | G  | 0.010401 | 0 |
| 8 | rs113795393   | 128191332 | G | A  | 0.001378 | 0 |
| 8 | rs13265475    | 128191580 | T | A  | 0.000251 | 0 |
| 8 | rs183028423   | 128191648 | T | C  | 0.008897 | 0 |
| 8 | rs188140481   | 128191672 | T | A  | 0.015789 | 1 |
| 8 | rs192932167   | 128191706 | T | C  | 0.000501 | 0 |
| 8 | kgp20572603   | 128191778 | C | T  | 0.000752 | 0 |
| 8 | rs2456448     | 128191795 | G | A  | 0.654887 | 0 |
| 8 | rs147310619   | 128191808 | G | A  | 0.000501 | 0 |
| 8 | rs78241450    | 128191809 | T | G  | 0.000251 | 0 |
| 8 | kgp28763301   | 128192152 | A | C  | 0.009524 | 0 |
| 8 | rs146603993   | 128192331 | C | CA | 0.001128 | 0 |
| 8 | rs72728012    | 128192647 | C | T  | 0.246742 | 0 |
| 8 | rs187959147   | 128192651 | C | T  | 0.007393 | 0 |
| 8 | rs113230300   | 128192676 | G | A  | 0.000125 | 0 |
| 8 | rs112562708   | 128192717 | G | A  | 0.000376 | 0 |
| 8 | rs2466026     | 128192817 | A | G  | 0.586717 | 0 |
| 8 | rs146726331   | 128192892 | G | A  | 0.000627 | 0 |
| 8 | rs140267348   | 128192905 | G | A  | 0.000877 | 0 |
| 8 | exm-rs2456449 | 128192981 | A | G  | 0.341729 | 0 |
| 8 | kgp11814436   | 128193052 | C | G  | 0.25802  | 0 |
| 8 | rs79655367    | 128193217 | A | T  | 0.046115 | 0 |
| 8 | rs115711114   | 128193263 | C | T  | 0.000501 | 0 |
| 8 | rs114081146   | 128193272 | G | A  | 0.000251 | 0 |
| 8 | rs149105384   | 128193288 | G | T  | 0.000251 | 0 |
| 8 | rs897586      | 128193294 | G | A  | 0.342105 | 0 |
| 8 | kgp12177089   | 128193303 | G | A  | 0.105263 | 1 |
| 8 | rs73335523    | 128193341 | G | A  | 0.011654 | 0 |
| 8 | rs1964690     | 128193606 | C | G  | 0.387845 | 0 |
| 8 | kgp6828358    | 128193658 | A | G  | 0.045363 | 0 |
| 8 | rs145819569   | 128193741 | G | A  | 0.000376 | 0 |
| 8 | rs185258295   | 128193770 | A | C  | 0.001629 | 0 |
| 8 | kgp295862     | 128193841 | C | T  | 0.013158 | 0 |
| 8 | rs79970709    | 128193898 | C | G  | 0.000501 | 0 |
| 8 | rs60340240    | 128194118 | T | C  | 0.001504 | 0 |
| 8 | rs35972752    | 128194169 | G | A  | 0.000251 | 0 |
| 8 | rs115316824   | 128194229 | T | G  | 0.000627 | 0 |
| 8 | kgp28576019   | 128194230 | C | A  | 0.007393 | 0 |
| 8 | rs16902006    | 128194327 | G | T  | 0.000376 | 0 |
| 8 | rs34848318    | 128194456 | C | T  | 0.000251 | 0 |
| 8 | rs150873949   | 128194471 | C | T  | 0.000125 | 0 |

|   |             |           |        |       |          |   |
|---|-------------|-----------|--------|-------|----------|---|
| 8 | rs1456304   | 128194694 | A      | T     | 0.046241 | 0 |
| 8 | rs139999773 | 128194699 | C      | T     | 0.000251 | 0 |
| 8 | rs181467736 | 128194714 | T      | C     | 0.000752 | 0 |
| 8 | rs115563653 | 128194755 | T      | A     | 0.000627 | 0 |
| 8 | kgp9986309  | 128195064 | A      | G     | 0.048997 | 0 |
| 8 | rs2124594   | 128195259 | T      | C     | 0.335464 | 0 |
| 8 | rs200390208 | 128195284 | GA     | G     | 0.001378 | 0 |
| 8 | rs140099016 | 128195334 | T      | C     | 0.320551 | 0 |
| 8 | rs149782417 | 128195335 | G      | A     | 0.320426 | 0 |
| 8 | rs2392738   | 128195337 | C      | T     | 0.320426 | 0 |
| 8 | rs147772813 | 128195726 | T      | G     | 0.011654 | 0 |
| 8 | rs2456450   | 128196360 | A      | G     | 0.355388 | 0 |
| 8 | rs143789596 | 128196473 | G      | A     | 0.004135 | 0 |
| 8 | rs117388394 | 128196508 | A      | G     | 0.00188  | 0 |
| 8 | rs143062437 | 128196509 | C      | T     | 0.001003 | 0 |
| 8 | rs112564161 | 128196595 | C      | G     | 0.001128 | 0 |
| 8 | rs138821012 | 128196614 | C      | T     | 0.000627 | 0 |
| 8 | rs2456451   | 128196627 | G      | A     | 0.339474 | 0 |
| 8 | rs187927405 | 128196645 | A      | T     | 0.000125 | 0 |
| 8 | rs202048203 | 128196674 | AAAAAT | A     | 0.046241 | 0 |
| 8 | rs116023438 | 128196976 | A      | C     | 0.000627 | 0 |
| 8 | rs2456452   | 128197080 | A      | G     | 0.650501 | 0 |
| 8 | rs2445610   | 128197088 | A      | G     | 0.354887 | 0 |
| 8 | rs16902008  | 128197295 | T      | G     | 0.046366 | 0 |
| 8 | rs150818314 | 128197348 | T      | C     | 0.000376 | 0 |
| 8 | rs143641428 | 128197361 | AG     | A     | 0.000501 | 0 |
| 8 | rs75733747  | 128197431 | C      | T     | 0.003008 | 0 |
| 8 | rs150007938 | 128197537 | G      | T     | 0.000125 | 0 |
| 8 | rs73350017  | 128197540 | A      | G     | 0.044486 | 0 |
| 8 | rs200872649 | 128197710 | C      | CAGTG | 0.01792  | 0 |
| 8 | rs140459423 | 128197737 | A      | G     | 0.000251 | 0 |
| 8 | rs2445611   | 128197819 | A      | G     | 0.549499 | 0 |
| 8 | rs2445612   | 128197856 | T      | C     | 0.42594  | 0 |
| 8 | rs58329648  | 128198084 | C      | T     | 0.000125 | 0 |
| 8 | rs116722593 | 128198147 | C      | T     | 0.000627 | 0 |
| 8 | rs13279336  | 128198257 | C      | G     | 0.010652 | 0 |
| 8 | rs181028990 | 128198378 | G      | T     | 0.000125 | 0 |
| 8 | rs150482926 | 128198502 | AAAAG  | A     | 0.010777 | 0 |
| 8 | kgp11697583 | 128198564 | C      | T     | 0.07807  | 0 |
| 8 | kgp4971184  | 128198798 | G      | A     | 0.054637 | 0 |
| 8 | rs57158859  | 128198832 | G      | A     | 0.000251 | 0 |
| 8 | kgp11941633 | 128199026 | T      | G     | 0.013283 | 0 |
| 8 | rs78484737  | 128199056 | T      | A     | 0.000125 | 0 |
| 8 | rs59744910  | 128199247 | CAT    | C     | 0.002256 | 0 |
| 8 | kgp28967395 | 128199285 | C      | T     | 0.004762 | 0 |
| 8 | rs75761479  | 128199459 | A      | G     | 0.000125 | 0 |
| 8 | rs145099654 | 128199578 | T      | A     | 0.000877 | 0 |

|   |             |           |        |     |          |   |
|---|-------------|-----------|--------|-----|----------|---|
| 8 | rs146121162 | 128199753 | AG     | A   | 0.096241 | 0 |
| 8 | rs1020700   | 128200052 | A      | T   | 0.284085 | 0 |
| 8 | rs73350022  | 128200106 | C      | T   | 0.010401 | 0 |
| 8 | rs73350024  | 128200193 | T      | C   | 0.010401 | 0 |
| 8 | rs73350025  | 128200518 | G      | A   | 0.010401 | 0 |
| 8 | rs2466028   | 128200556 | T      | C   | 0.375564 | 0 |
| 8 | rs115256765 | 128200916 | A      | G   | 0.000376 | 0 |
| 8 | rs150634304 | 128200948 | C      | T   | 0.000251 | 0 |
| 8 | kgp8407640  | 128200955 | A      | G   | 0.004637 | 0 |
| 8 | rs2466029   | 128200971 | C      | G   | 0.375313 | 0 |
| 8 | rs147399323 | 128201157 | G      | A   | 0.000376 | 0 |
| 8 | rs71520637  | 128201190 | C      | T   | 0.000752 | 0 |
| 8 | rs28555160  | 128201251 | A      | G   | 0.003885 | 0 |
| 8 | rs2456453   | 128201359 | C      | T   | 0.361529 | 0 |
| 8 | rs149955093 | 128201388 | C      | T   | 0.000376 | 0 |
| 8 | rs188681405 | 128201423 | T      | A   | 0.000125 | 0 |
| 8 | rs193199840 | 128201783 | A      | C   | 0.002506 | 0 |
| 8 | rs34480705  | 128201953 | C      | G   | 0.000752 | 0 |
| 8 | rs62531102  | 128202356 | T      | G   | 0.026817 | 0 |
| 8 | rs138956333 | 128202421 | T      | C   | 0.000627 | 0 |
| 8 | rs74960914  | 128202473 | C      | T   | 0.026817 | 0 |
| 8 | rs80240466  | 128202708 | T      | C   | 0.001378 | 0 |
| 8 | rs28446612  | 128202825 | G      | A   | 0.004637 | 0 |
| 8 | rs143864301 | 128202986 | AAAAAT | A   | 0.000501 | 0 |
| 8 | rs201245619 | 128203022 | C      | CTT | 0.39411  | 0 |
| 8 | rs201871494 | 128203025 | T      | TCG | 0.39411  | 0 |
| 8 | kgp6560645  | 128203117 | C      | A   | 0.036591 | 0 |
| 8 | kgp5668462  | 128203325 | G      | A   | 0.003509 | 0 |
| 8 | rs143230367 | 128203389 | C      | T   | 0.000501 | 0 |
| 8 | rs62531103  | 128203425 | G      | A   | 0.026817 | 0 |
| 8 | kgp3535266  | 128203672 | A      | G   | 0.007143 | 0 |
| 8 | rs113246033 | 128203779 | A      | G   | 0.000376 | 0 |
| 8 | rs143107310 | 128203856 | C      | T   | 0.000501 | 0 |
| 8 | rs1021954   | 128203857 | A      | G   | 0.380075 | 0 |
| 8 | kgp4312143  | 128203859 | T      | A   | 0.113409 | 1 |
| 8 | kgp6786979  | 128203973 | A      | G   | 0.380075 | 0 |
| 8 | kgp11102583 | 128204036 | T      | C   | 0.005764 | 0 |
| 8 | rs16902019  | 128204060 | T      | G   | 0.072682 | 0 |
| 8 | rs1473581   | 128204216 | C      | T   | 0.302005 | 0 |
| 8 | kgp10433231 | 128204230 | G      | A   | 0.018045 | 0 |
| 8 | rs78886044  | 128204252 | G      | A   | 0.000125 | 0 |
| 8 | rs10216368  | 128204395 | C      | A   | 0.001253 | 0 |
| 8 | rs185395979 | 128204460 | T      | G   | 0.001504 | 0 |
| 8 | rs76862233  | 128204461 | G      | T   | 0.030702 | 0 |
| 8 | rs10216379  | 128204484 | G      | T   | 0.023183 | 0 |
| 8 | rs182554890 | 128204604 | T      | A   | 0.001003 | 0 |
| 8 | rs187640640 | 128204642 | C      | A   | 0.001003 | 0 |

|   |             |           |    |   |          |   |
|---|-------------|-----------|----|---|----------|---|
| 8 | rs191991270 | 128204678 | T  | A | 0.010025 | 0 |
| 8 | rs139616075 | 128206325 | G  | A | 0.001253 | 0 |
| 8 | rs9720564   | 128206369 | C  | G | 0.02594  | 0 |
| 8 | rs9721234   | 128206385 | T  | G | 0.02594  | 0 |
| 8 | rs192041861 | 128206415 | A  | G | 0.001253 | 0 |
| 8 | rs141798929 | 128206432 | A  | T | 0.000376 | 0 |
| 8 | rs182774308 | 128206445 | T  | C | 0.001003 | 0 |
| 8 | rs2456454   | 128206623 | T  | G | 0.40401  | 0 |
| 8 | rs149673464 | 128206702 | T  | G | 0.003759 | 0 |
| 8 | rs73350039  | 128206932 | A  | T | 0.030702 | 0 |
| 8 | kgp619520   | 128207099 | C  | T | 0.030702 | 0 |
| 8 | rs2466030   | 128207138 | T  | C | 0.301378 | 0 |
| 8 | rs148974531 | 128207194 | A  | G | 0.000501 | 0 |
| 8 | rs116302466 | 128207306 | A  | T | 0.000125 | 0 |
| 8 | rs149178218 | 128207437 | AT | A | 0.000125 | 0 |
| 8 | kgp20355952 | 128207466 | G  | A | 0.001378 | 0 |
| 8 | kgp20185840 | 128207650 | A  | G | 0.002381 | 0 |
| 8 | rs189565078 | 128207832 | G  | A | 0.00589  | 0 |
| 8 | rs6651241   | 128207871 | C  | T | 0.002381 | 0 |
| 8 | rs71520643  | 128207977 | C  | T | 0.000251 | 0 |
| 8 | rs16902023  | 128208028 | G  | A | 0.000627 | 0 |
| 8 | kgp22803639 | 128208187 | G  | A | 0.000251 | 0 |
| 8 | rs190897987 | 128208191 | T  | C | 0.009398 | 0 |
| 8 | rs147054803 | 128208209 | A  | C | 0.002882 | 0 |
| 8 | rs138042437 | 128208369 | A  | G | 0.014912 | 1 |
| 8 | kgp704630   | 128208413 | C  | T | 0.030702 | 0 |
| 8 | rs12548989  | 128208453 | C  | T | 0.207268 | 1 |
| 8 | kgp3389730  | 128208454 | G  | A | 0.273935 | 0 |
| 8 | rs62531107  | 128208750 | G  | T | 0.030576 | 0 |
| 8 | rs71520644  | 128208833 | A  | G | 0.000752 | 0 |
| 8 | rs144013913 | 128208931 | C  | T | 0.000251 | 0 |
| 8 | rs114053525 | 128208994 | G  | A | 0.001128 | 0 |
| 8 | kgp2767179  | 128209082 | T  | C | 0.406015 | 0 |
| 8 | kgp8921892  | 128209099 | C  | T | 0.074311 | 0 |
| 8 | rs148702520 | 128209378 | A  | G | 0.002882 | 0 |
| 8 | rs11986553  | 128209438 | T  | C | 0.000251 | 0 |
| 8 | kgp11897178 | 128209439 | A  | G | 0.015915 | 0 |
| 8 | kgp20562677 | 128209505 | G  | A | 0.000877 | 0 |
| 8 | rs2466031   | 128209609 | A  | G | 0.406767 | 0 |
| 8 | kgp7940133  | 128209636 | G  | A | 0.008271 | 0 |
| 8 | rs2466032   | 128209820 | T  | C | 0.300125 | 0 |
| 8 | rs192654309 | 128209964 | G  | A | 0.004261 | 0 |
| 8 | rs115209859 | 128210078 | T  | C | 0.000251 | 0 |
| 8 | rs17375869  | 128210262 | G  | C | 0.026817 | 0 |
| 8 | rs11357342  | 128210342 | CA | C | 0.318922 | 0 |
| 8 | kgp1088870  | 128210356 | A  | G | 0.029323 | 0 |
| 8 | rs192290697 | 128210374 | C  | T | 0.003383 | 0 |

|   |             |           |       |    |          |   |
|---|-------------|-----------|-------|----|----------|---|
| 8 | rs2466033   | 128210582 | G     | T  | 0.246491 | 0 |
| 8 | kgp2054038  | 128210620 | A     | G  | 0.028822 | 0 |
| 8 | rs1378902   | 128210666 | T     | A  | 0.321805 | 0 |
| 8 | rs115245188 | 128210683 | G     | A  | 0.000376 | 0 |
| 8 | rs116091021 | 128210789 | T     | G  | 0.000376 | 0 |
| 8 | rs2466035   | 128211229 | T     | C  | 0.32218  | 0 |
| 8 | rs75513132  | 128211389 | G     | T  | 0.069424 | 0 |
| 8 | rs2466036   | 128211494 | A     | G  | 0.221303 | 0 |
| 8 | rs148120863 | 128211555 | T     | C  | 0.000501 | 0 |
| 8 | rs150099991 | 128211677 | TAAAC | T  | 0.003885 | 0 |
| 8 | rs116787092 | 128211817 | G     | A  | 0.001128 | 0 |
| 8 | kgp2969550  | 128211972 | A     | G  | 0.014536 | 0 |
| 8 | rs2466037   | 128212084 | C     | A  | 0.255514 | 0 |
| 8 | rs2466038   | 128212409 | G     | A  | 0.22193  | 0 |
| 8 | rs141852216 | 128212483 | T     | C  | 0.000501 | 0 |
| 8 | rs2445613   | 128212521 | G     | C  | 0.22193  | 0 |
| 8 | rs2516295   | 128212523 | G     | A  | 0.255514 | 0 |
| 8 | rs2445614   | 128212594 | C     | T  | 0.255514 | 0 |
| 8 | kgp8049472  | 128212633 | G     | A  | 0.003509 | 0 |
| 8 | rs2466039   | 128212680 | C     | A  | 0.25     | 0 |
| 8 | rs13254141  | 128212937 | T     | C  | 0.001504 | 0 |
| 8 | rs137893481 | 128213006 | C     | T  | 0.000125 | 0 |
| 8 | rs142390041 | 128213007 | G     | A  | 0.002882 | 0 |
| 8 | rs13251958  | 128213015 | A     | G  | 0.003008 | 0 |
| 8 | rs183127372 | 128213025 | A     | T  | 0.002506 | 0 |
| 8 | rs145933573 | 128213149 | A     | T  | 0.000125 | 0 |
| 8 | rs9643217   | 128213233 | A     | G  | 0.074436 | 0 |
| 8 | rs77610751  | 128213251 | C     | T  | 0.001504 | 0 |
| 8 | kgp4096430  | 128213308 | C     | T  | 0.025689 | 0 |
| 8 | rs115910016 | 128213544 | A     | G  | 0.000376 | 0 |
| 8 | rs35961416  | 128213561 | C     | CA | 0.419799 | 0 |
| 8 | rs189883640 | 128213580 | A     | G  | 0.000125 | 0 |
| 8 | rs1378901   | 128213807 | T     | C  | 0.453759 | 1 |
| 8 | rs78358967  | 128213866 | C     | G  | 0.000752 | 0 |
| 8 | rs116707089 | 128213900 | G     | A  | 0.000501 | 0 |
| 8 | rs193065474 | 128213909 | G     | A  | 0.000501 | 0 |
| 8 | kgp20277961 | 128214008 | C     | T  | 0.000627 | 0 |
| 8 | rs16902026  | 128214050 | T     | G  | 0.000251 | 0 |
| 8 | kgp8693611  | 128214130 | C     | A  | 0.071679 | 0 |
| 8 | kgp2052645  | 128214499 | A     | G  | 0.053133 | 0 |
| 8 | kgp20399083 | 128214610 | C     | T  | 0.000501 | 0 |
| 8 | rs55678233  | 128214618 | G     | C  | 0.243734 | 0 |
| 8 | rs202220524 | 128214640 | G     | GA | 0.012406 | 0 |
| 8 | rs144940621 | 128214727 | A     | G  | 0.011278 | 0 |
| 8 | kgp20395694 | 128214778 | T     | C  | 0.000251 | 0 |
| 8 | kgp5797611  | 128214863 | C     | T  | 0.026692 | 0 |
| 8 | rs181817763 | 128215146 | C     | T  | 0.004762 | 0 |



|   |             |           |      |   |          |   |
|---|-------------|-----------|------|---|----------|---|
| 8 | rs182395051 | 128215636 | T    | C | 0.013409 | 0 |
| 8 | rs112581722 | 128215648 | A    | G | 0.046867 | 0 |
| 8 | rs189604686 | 128215768 | G    | T | 0.004135 | 0 |
| 8 | rs200457197 | 128216015 | CAT  | C | 0.001128 | 0 |
| 8 | rs10113744  | 128216355 | A    | C | 0.305138 | 0 |
| 8 | rs117166789 | 128216394 | A    | C | 0.002005 | 0 |
| 8 | rs10113764  | 128216400 | A    | C | 0.019925 | 0 |
| 8 | rs10086030  | 128216433 | C    | A | 0.004386 | 0 |
| 8 | rs148251701 | 128216472 | A    | C | 0.000125 | 0 |
| 8 | rs10086049  | 128216486 | C    | T | 0.004762 | 0 |
| 8 | rs116788384 | 128216582 | C    | A | 0.000125 | 0 |
| 8 | rs138153629 | 128216716 | C    | T | 0.000125 | 0 |
| 8 | rs61462910  | 128216808 | A    | G | 0.000125 | 0 |
| 8 | kgp20600127 | 128217462 | T    | G | 0.008396 | 0 |
| 8 | rs190632839 | 128217634 | G    | C | 0.000125 | 0 |
| 8 | rs7837911   | 128217812 | A    | G | 0.00802  | 0 |
| 8 | kgp20365897 | 128217961 | A    | C | 0.001504 | 0 |
| 8 | rs201553506 | 128218028 | GGGC | G | 0.045739 | 0 |
| 8 | rs199932803 | 128218030 | GC   | G | 0.077068 | 0 |
| 8 | rs113343238 | 128218040 | G    | C | 0.075815 | 0 |
| 8 | rs35967454  | 128218318 | A    | G | 0.002506 | 0 |



## SUPPLEMENTAL TABLES AND FIGURES

### Genome-wide association of familial prostate cancer cases identifies evidence for a rare segregating haplotype at 8q24.21

Human Genetics

Craig C. Teerlink\*,<sup>1</sup> Daniel Leongamornlert,<sup>2</sup> Tokhir Dadaev,<sup>2</sup> Alun Thomas,<sup>1</sup> James Farnham,<sup>1</sup> Robert A. Stephenson,<sup>3,4</sup> Shaun Riska,<sup>5</sup> Shannon K. McDonnell,<sup>5</sup> Daniel J. Schaid,<sup>5</sup> William J. Catalona,<sup>6</sup> S. Lilly Zheng,<sup>6</sup> Kathleen A. Cooney,<sup>7</sup> Anna M. Ray,<sup>7</sup> Kimberly A. Zuhlke,<sup>7</sup> Ethan M. Lange,<sup>8</sup> Graham G. Giles,<sup>9-11</sup> Melissa C. Southey,<sup>12</sup> Liesel M. Fitzgerald,<sup>9</sup> Antje Rinckleb,<sup>13</sup> Manuel Luedeke,<sup>13</sup> Christiane Maier,<sup>14</sup> Janet L. Stanford,<sup>15</sup> Elaine A. Ostrander,<sup>16</sup> Elina Kaikkonen,<sup>17</sup> Csilla Sipeky,<sup>17</sup> Teuvo Tammela,<sup>18</sup> Johanna Schleutker,<sup>19</sup> Kathleen E. Wiley,<sup>20</sup> Sarah D. Isaacs,<sup>20</sup> Patrick C. Walsh,<sup>20</sup> William B. Isaacs,<sup>20</sup> Jianfeng Xu,<sup>21</sup> Geraldine Cancel-Tassin,<sup>22</sup> Olivier Cussenot,<sup>22</sup> Diptasri Mandal,<sup>23</sup> Cecelia Laurie,<sup>24</sup> Cathy Laurie,<sup>24</sup> International Consortium for Prostate Cancer Genetics, The PRACTICAL consortium,<sup>†</sup> Stephen N. Thibodeau,<sup>25</sup> Ros Eeles,<sup>2</sup> Zsofia Kote-Jarai,<sup>2</sup> Lisa Cannon-Albright<sup>1,26</sup>

<sup>1</sup> Department of Internal Medicine, University of Utah School of Medicine, Salt Lake City, UT, 84108, USA

<sup>2</sup> Division of Genetics and Epidemiology, Institute of Cancer Research, London, SW7 3RP, UK

<sup>3</sup> Departments of Urology and Surgery, University of Utah School of Medicine, Salt Lake City, UT, 84132, USA

<sup>4</sup> Huntsman Cancer Institute, University of Utah, Salt Lake City, UT, 84112, USA

<sup>5</sup> Department of Health Sciences Research, Mayo Clinic, Rochester, MN, 55905, USA

<sup>6</sup> Feinberg School of Medicine, Northwestern University, Chicago, IL, 60611, USA

<sup>7</sup> Departments of Internal Medicine and Urology, Department of Internal Medicine, University of Michigan Medical School, Ann Arbor, MI, 48109, USA

<sup>8</sup> Departments of Genetics and Biostatistics, University of North Carolina, Chapel Hill, NC, 27599, USA

- <sup>9</sup> Cancer Epidemiology Centre, Cancer Council Victoria, Melbourne, 3004, Australia
- <sup>10</sup> Centre for Epidemiology and Biostatistics, Melbourne School of Population and Global Health, University of Melbourne, Victoria, 3010, Australia
- <sup>11</sup> Department of Epidemiology and Preventive Medicine, Monash University, Melbourne, Victoria, 3004, Australia
- <sup>12</sup> Department of Pathology, University of Melbourne, Melbourne, 3010, Australia
- <sup>13</sup> Department of Urology, University Hospital Ulm, Ulm, 53179, Germany
- <sup>14</sup> Institute for Human Genetics, University of Ulm, Ulm, 89081, Germany
- <sup>15</sup> Fred Hutchinson Cancer Research Center (FHCRC), Division of Public Health Sciences, Seattle, WA, 98109, USA
- <sup>16</sup> Cancer Genetics Branch, National Human Genome Research Institute (NHGRI), National Institutes of Health (NIH), Bethesda, MD, 20892, USA
- <sup>17</sup> Department of Medical Biochemistry and Genetics, University of Turku, Turku, 20520, Finland
- <sup>18</sup> Department of Urology, University of Tampere and Tampere University Hospital, Tampere, 33520, Finland
- <sup>19</sup> Department of Medical Biochemistry and Genetics, University of Turku, and Tyks Microbiology and Genetics, Department of Medical Genetics, Turku University Hospital, Turku, 20520, Finland
- <sup>20</sup> Brady Urological Institute, Johns Hopkins University, Baltimore, MD, 21287, USA
- <sup>21</sup> Program for Personalized Cancer Care, NorthShore University Health System, Evanston, IL, 60201, USA
- <sup>22</sup> CeRePP, Hopital Tenon, Assistance Publique-Hopitaux de Paris, Paris, 75020, France
- <sup>23</sup> Department of Genetics, Louisiana State University Health Sciences Center, New Orleans, LA, 70112, USA
- <sup>24</sup> Department of Biostatistics, University of Washington, Seattle, WA, 98195, USA
- <sup>25</sup> Department of Lab Medicine and Pathology, Mayo Clinic, Rochester, MN, 55905, USA

<sup>26</sup> George E. Wahlen Department of Veterans Affairs Medical Center, Salt Lake City, UT, 84148, USA

‡Members from the Prostate Cancer Association Group to Investigate Cancer Associated Alterations in the Genome (PRACTICAL) consortium are provided in the Supplemental Material. Information of the consortium can be found at <http://practical.ccge.medschl.cam.ac.uk/>.

Correspondence: craig.teerlink@utah.edu

**Supplemental Table 1.** The PRACTICAL CONSORTIUM (in addition to those named in the author list)

Information of the consortium can be found at <http://practical.ccge.medschl.cam.ac.uk/>

Additional members from the consortium are:

| <b>Study</b>           | <b>Name</b>                     | <b>Affiliation/s</b>                                                                                                                                                                                                                                |
|------------------------|---------------------------------|-----------------------------------------------------------------------------------------------------------------------------------------------------------------------------------------------------------------------------------------------------|
| PRACTICAL PI           | Doug Easton                     | Centre for Cancer Genetic Epidemiology, Department of Public Health and Primary Care, University of Cambridge, Strangeways Research Laboratory, Worts Causeway, Cambridge, UK                                                                       |
| PRACTICAL PI, UKGPCS   | Rosalind Eeles                  | The Institute of Cancer Research, 15 Cotswold Road, Sutton, Surrey, SM2 5NG, UK<br>Royal Marsden NHS Foundation Trust, Fulham and Sutton, London and Surrey, UK                                                                                     |
| PRACTICAL co-PI        | Zsofia Kote-Jarai               | The Institute of Cancer Research, 15 Cotswold Road, Sutton, Surrey, SM2 5NG, UK                                                                                                                                                                     |
| PRACTICAL co-ordinator | Sara Benlloch                   | Centre for Cancer Genetic Epidemiology, Department of Public Health and Primary Care, University of Cambridge, Strangeways Research Laboratory, Worts Causeway, Cambridge, UK                                                                       |
| PRACTICAL statistician | Ali Amin Al Olama               | Centre for Cancer Genetic Epidemiology, Department of Public Health and Primary Care, University of Cambridge, Strangeways Research Laboratory, Worts Causeway, Cambridge, UK                                                                       |
| UKGPCS<br>MCCS         | Kenneth Muir<br>Graham G. Giles | University of Warwick, Coventry, UK<br>The Cancer Council Victoria, 615 St Kilda Road, Melbourne, Victoria 3004, Australia                                                                                                                          |
| STHM1                  | Fredrik Wiklund                 | Centre for Epidemiology and Biostatistics, Melbourne School of Population and Global Health, The University of Melbourne, Victoria 3010, Australia<br>Department of Medical Epidemiology and Biostatistics, Karolinska Institute, Stockholm, Sweden |

|                 |                                       |                                                                                                                                                                                                                                                                                                              |
|-----------------|---------------------------------------|--------------------------------------------------------------------------------------------------------------------------------------------------------------------------------------------------------------------------------------------------------------------------------------------------------------|
| CAPS            | Henrik Gronberg                       | Department of Medical Epidemiology and Biostatistics, Karolinska Institute, Stockholm, Sweden                                                                                                                                                                                                                |
| MEC             | Christopher A. Haiman                 | Department of Preventive Medicine, Keck School of Medicine, University of Southern California/Norris Comprehensive Cancer Center, Los Angeles, California, USA                                                                                                                                               |
| TAMPERE         | Johanna Schleutker                    | Department of Medical Biochemistry and Genetics, University of Turku, Turku, Finland                                                                                                                                                                                                                         |
| CPCS1, CPCS2    | Børge G. Nordestgaard                 | Institute of Biomedical Technology/BioMediTech, University of Tampere and FimLab Laboratories, Tampere, Finland<br>Department of Clinical Biochemistry, Herlev Hospital, Copenhagen University Hospital, Herlev Ringvej 75, DK-2730 Herlev, Denmark                                                          |
| EPIC            | Ruth C. Travis                        | Cancer Epidemiology Unit, Nuffield Department of Clinical Medicine, University of Oxford, Oxford, UK                                                                                                                                                                                                         |
| ProMPT, ProtecT | David Neal                            | Surgical Oncology (Uro-Oncology: S4), University of Cambridge, Box 279, Addenbrooke's Hospital, Hills Road, Cambridge, UK and Cancer Research UK Cambridge Research Institute, Li Ka Shing Centre, Cambridge, UK                                                                                             |
| SEARCH          | Nora Pashayan                         | Centre for Cancer Genetic Epidemiology, Department of Oncology, University of Cambridge, Strangeways Research Laboratory, Worts Causeway, Cambridge, UK<br>University College London, Department of Applied Health Research, 1-19 Torrington Place, London, WC1E 7HB, UK                                     |
| EPIC-Norfolk    | Kay-Tee Khaw                          | Cambridge Institute of Public Health, University of Cambridge, Forvie Site, Robinson Way, Cambridge CB2 0SR, UK                                                                                                                                                                                              |
| FHCRC           | Janet L. Stanford                     | Division of Public Health Sciences, Fred Hutchinson Cancer Research Center, Seattle, Washington, USA<br>Department of Epidemiology, School of Public Health, University of Washington, Seattle, Washington, USA                                                                                              |
| SCCS            | William J. Blot                       | International Epidemiology Institute, 1455 Research Blvd., Suite 550, Rockville, MD 20850, USA                                                                                                                                                                                                               |
| MAYO ULM        | Stephen Thibodeau<br>Christiane Maier | Mayo Clinic, Rochester, Minnesota, USA<br>Department of Urology, University Hospital Ulm, Germany<br>Institute of Human Genetics University Hospital Ulm, Germany                                                                                                                                            |
| WUGS            | Adam S. Kibel                         | Brigham and Women's Hospital/Dana-Farber Cancer Institute, 45 Francis Street- ASB II-3, Boston, MA 02115, USA                                                                                                                                                                                                |
| Poland          | Cezary Cybulski                       | Washington University, St Louis, Missouri, USA<br>International Hereditary Cancer Center, Department of Genetics and Pathology, Pomeranian Medical University, Szczecin, Poland                                                                                                                              |
| UTAH            | Lisa Cannon-Albright                  | Division of Genetic Epidemiology, Department of Medicine, University of Utah School of Medicine, USA                                                                                                                                                                                                         |
| ESTHER          | Hermann Brenner                       | Division of Clinical Epidemiology and Aging Research, German Cancer Research Center (DKFZ), Heidelberg Germany,<br>Division of Preventive Oncology,, German Cancer Research Center (DKFZ), Heidelberg Germany,<br>German Cancer Consortium (DKTK), German Cancer Research Center (DKFZ), Heidelberg Germany, |

|           |                    |                                                                                                                                                                                                       |
|-----------|--------------------|-------------------------------------------------------------------------------------------------------------------------------------------------------------------------------------------------------|
| MOFFITT   | Jong Park          | Division of Cancer Prevention and Control, H. Lee Moffitt Cancer Center, 12902 Magnolia Dr., Tampa, Florida, USA                                                                                      |
| PCMUS     | Radka Kaneva       | Molecular Medicine Center and Department of Medical Chemistry and Biochemistry, Medical University - Sofia, 2 Zdrave St, 1431, Sofia, Bulgaria                                                        |
| QLD       | Jyotsna Batra      | Australian Prostate Cancer Research Centre-Qld, Institute of Health and Biomedical Innovation and Schools of Life Science and Public Health, Queensland University of Technology, Brisbane, Australia |
| IPO-Porto | Manuel R. Teixeira | Department of Genetics, Portuguese Oncology Institute, Porto, Portugal and Biomedical Sciences Institute (ICBAS), Porto University, Porto, Portugal                                                   |
| PPF-UNIS  | Hardev Pandha      | The University of Surrey, Guildford, Surrey, GU2 7XH, UK                                                                                                                                              |

**Supplemental Table 2.** Significant SNPs ( $p < 5e^{-8}$ ) from the genome-wide association of 2,511 familial prostate cancer cases and 1,382 controls using imputed genotypes based on 1000 Genomes.

| Chromosome | Marker      | Position    | Minor allele | Alternative allele | Minor allele frequency | Odds ratio | 95% lower CI | 95% upper CI | P-value  |
|------------|-------------|-------------|--------------|--------------------|------------------------|------------|--------------|--------------|----------|
| 3          | kgp1923988  | 170,074,517 | C            | G                  | 0.192                  | 1.41       | 1.25         | 1.59         | 2.17E-08 |
| 6          | rs7740824   | 160,808,901 | T            | G                  | 0.311                  | 1.35       | 1.21         | 1.5          | 3.18E-08 |
| 6          | rs3105751   | 160,822,675 | G            | A                  | 0.306                  | 1.35       | 1.21         | 1.5          | 3.46E-08 |
| 6          | rs9364554   | 160,833,664 | T            | C                  | 0.311                  | 1.35       | 1.21         | 1.5          | 3.37E-08 |
| 6          | rs12194182  | 160,834,515 | C            | T                  | 0.311                  | 1.35       | 1.21         | 1.5          | 3.01E-08 |
| 6          | rs1112444   | 160,835,192 | A            | C                  | 0.311                  | 1.35       | 1.21         | 1.5          | 3.21E-08 |
| 6          | rs10455782  | 160,839,350 | T            | C                  | 0.356                  | 1.37       | 1.23         | 1.51         | 3.30E-09 |
| 6          | rs3123636   | 160,842,537 | C            | T                  | 0.356                  | 1.37       | 1.23         | 1.51         | 2.81E-09 |
| 6          | rs2661839   | 160,849,140 | T            | A                  | 0.357                  | 1.36       | 1.22         | 1.5          | 5.94E-09 |
| 8          | rs182352457 | 127,941,793 | A            | G                  | 0.019                  | 6.91       | 3.59         | 13.29        | 7.27E-09 |
| 8          | rs28561575  | 128,014,009 | T            | C                  | 0.236                  | 1.36       | 1.22         | 1.52         | 3.92E-08 |
| 8          | rs28556804  | 128,014,315 | G            | A                  | 0.236                  | 1.36       | 1.22         | 1.52         | 4.21E-08 |
| 8          | rs9297750   | 128,022,973 | G            | A                  | 0.226                  | 1.37       | 1.22         | 1.53         | 4.85E-08 |

|   |             |             |   |        |       |       |      |       |          |
|---|-------------|-------------|---|--------|-------|-------|------|-------|----------|
| 8 | kgp9645322  | 128,077,146 | A | G      | 0.044 | 2.39  | 1.81 | 3.16  | 8.22E-10 |
| 8 | rs1031589   | 128,092,982 | G | A      | 0.416 | 1.36  | 1.23 | 1.5   | 1.31E-09 |
| 8 | rs1031587   | 128,093,472 | G | A      | 0.415 | 1.36  | 1.23 | 1.5   | 1.17E-09 |
| 8 | rs4871008   | 128,093,541 | T | C      | 0.415 | 1.36  | 1.23 | 1.5   | 1.17E-09 |
| 8 | rs6981122   | 128,094,460 | A | C      | 0.413 | 1.35  | 1.22 | 1.49  | 3.60E-09 |
| 8 | kgp5314987  | 128,094,483 | T | G      | 0.413 | 1.35  | 1.22 | 1.49  | 2.55E-09 |
| 8 | kgp9938326  | 128,103,979 | C | T      | 0.2   | 1.43  | 1.27 | 1.61  | 4.85E-09 |
| 8 | rs183373024 | 128,104,117 | G | A      | 0.017 | 7.63  | 3.9  | 14.93 | 2.90E-09 |
| 8 | rs35365584  | 128,108,726 | A | G      | 0.315 | 1.34  | 1.21 | 1.49  | 2.98E-08 |
| 8 | rs56005245  | 128,113,426 | T | C      | 0.225 | 1.41  | 1.25 | 1.59  | 1.27E-08 |
| 8 | rs3100857   | 128,159,432 | C | T      | 0.369 | 1.34  | 1.21 | 1.49  | 3.10E-08 |
| 8 | rs188140481 | 128,191,672 | A | T      | 0.016 | 9.38  | 4.43 | 19.88 | 5.15E-09 |
| 8 | rs138042437 | 128,208,369 | G | A      | 0.015 | 13.25 | 5.37 | 32.69 | 2.08E-08 |
| 8 | rs143229300 | 128,320,509 | T | TTTTTG | 0.162 | 1.47  | 1.28 | 1.68  | 3.71E-08 |
| 8 | rs74822356  | 128,320,976 | G | C      | 0.166 | 1.49  | 1.3  | 1.71  | 7.27E-09 |
| 8 | rs72728057  | 128,321,413 | C | A      | 0.168 | 1.51  | 1.32 | 1.72  | 2.51E-09 |
| 8 | kgp760058   | 128,321,483 | C | T      | 0.169 | 1.5   | 1.31 | 1.72  | 3.18E-09 |
| 8 | rs72728061  | 128,321,583 | C | T      | 0.168 | 1.51  | 1.32 | 1.73  | 2.19E-09 |
| 8 | rs16902095  | 128,321,684 | T | G      | 0.164 | 1.49  | 1.3  | 1.71  | 1.11E-08 |
| 8 | rs60163266  | 128,323,157 | A | G      | 0.162 | 1.49  | 1.3  | 1.71  | 1.00E-08 |
| 8 | rs56736364  | 128,323,724 | T | C      | 0.162 | 1.49  | 1.3  | 1.7   | 1.27E-08 |
| 8 | rs34585331  | 128,323,731 | G | T      | 0.16  | 1.48  | 1.29 | 1.69  | 2.51E-08 |
| 8 | rs4506170   | 128,323,891 | C | T      | 0.166 | 1.51  | 1.32 | 1.73  | 2.18E-09 |
| 8 | rs151204419 | 128,323,951 | A | AG     | 0.161 | 1.49  | 1.3  | 1.71  | 1.10E-08 |
| 8 | rs139988765 | 128,324,071 | C | T      | 0.161 | 1.49  | 1.3  | 1.71  | 1.32E-08 |



|   |             |             |     |   |       |      |      |       |          |
|---|-------------|-------------|-----|---|-------|------|------|-------|----------|
| 8 | rs144898130 | 128,324,075 | T   | C | 0.161 | 1.49 | 1.3  | 1.71  | 1.58E-08 |
| 8 | rs192955651 | 128,324,718 | C   | A | 0.165 | 1.51 | 1.32 | 1.73  | 2.22E-09 |
| 8 | rs151184050 | 128,326,801 | C   | A | 0.16  | 1.48 | 1.29 | 1.7   | 2.06E-08 |
| 8 | rs186307710 | 128,327,210 | G   | C | 0.159 | 1.48 | 1.29 | 1.7   | 2.28E-08 |
| 8 | rs138105578 | 128,327,419 | G   | A | 0.159 | 1.48 | 1.29 | 1.7   | 2.05E-08 |
| 8 | rs140846233 | 128,327,457 | T   | C | 0.159 | 1.48 | 1.29 | 1.7   | 2.11E-08 |
| 8 | rs183738189 | 128,327,889 | A   | G | 0.155 | 1.49 | 1.29 | 1.71  | 2.73E-08 |
| 8 | rs191545467 | 128,327,920 | G   | C | 0.16  | 1.48 | 1.29 | 1.7   | 2.04E-08 |
| 8 | rs117510207 | 128,330,372 | G   | A | 0.163 | 1.49 | 1.3  | 1.71  | 9.17E-09 |
| 8 | rs116881722 | 128,330,510 | G   | T | 0.163 | 1.47 | 1.28 | 1.69  | 2.77E-08 |
| 8 | rs77635060  | 128,330,555 | C   | G | 0.162 | 1.49 | 1.3  | 1.71  | 1.18E-08 |
| 8 | rs146529058 | 128,331,510 | A   | G | 0.162 | 1.49 | 1.3  | 1.71  | 9.34E-09 |
| 8 | rs186935985 | 128,332,968 | A   | G | 0.162 | 1.49 | 1.3  | 1.71  | 8.58E-09 |
| 8 | rs138867633 | 128,333,103 | AT  | A | 0.162 | 1.49 | 1.3  | 1.71  | 9.10E-09 |
| 8 | rs72712308  | 128,333,220 | C   | T | 0.162 | 1.49 | 1.3  | 1.71  | 9.02E-09 |
| 8 | rs72712310  | 128,333,565 | A   | G | 0.162 | 1.49 | 1.3  | 1.71  | 9.31E-09 |
| 8 | rs55717424  | 128,335,079 | G   | A | 0.162 | 1.49 | 1.3  | 1.71  | 1.10E-08 |
| 8 | rs58104177  | 128,335,536 | A   | G | 0.162 | 1.49 | 1.3  | 1.71  | 1.16E-08 |
| 8 | rs72712332  | 128,336,053 | G   | C | 0.162 | 1.49 | 1.3  | 1.71  | 1.05E-08 |
| 8 | kgp7771502  | 128,336,664 | C   | A | 0.162 | 1.49 | 1.3  | 1.71  | 8.92E-09 |
| 8 | rs201361304 | 128,337,272 | TAC | T | 0.016 | 5.93 | 3.14 | 11.19 | 3.89E-08 |
| 8 | rs72712335  | 128,338,258 | A   | G | 0.162 | 1.49 | 1.3  | 1.71  | 8.89E-09 |
| 8 | rs16902101  | 128,340,124 | G   | C | 0.162 | 1.49 | 1.3  | 1.71  | 8.18E-09 |
| 8 | rs16902102  | 128,340,221 | A   | C | 0.162 | 1.49 | 1.3  | 1.71  | 8.09E-09 |
| 8 | rs16902103  | 128,340,374 | C   | A | 0.162 | 1.49 | 1.3  | 1.71  | 7.96E-09 |

|    |             |             |     |   |       |      |      |      |          |
|----|-------------|-------------|-----|---|-------|------|------|------|----------|
| 8  | rs201134695 | 128,340,492 | AAC | A | 0.162 | 1.5  | 1.3  | 1.71 | 7.87E-09 |
| 8  | rs72712338  | 128,340,537 | T   | A | 0.162 | 1.5  | 1.3  | 1.71 | 7.81E-09 |
| 8  | rs72712339  | 128,340,554 | T   | C | 0.162 | 1.5  | 1.3  | 1.71 | 7.79E-09 |
| 8  | rs16902104  | 128,340,908 | T   | C | 0.162 | 1.5  | 1.31 | 1.72 | 6.41E-09 |
| 8  | rs60497658  | 128,341,810 | C   | T | 0.164 | 1.51 | 1.32 | 1.73 | 3.53E-09 |
| 8  | rs72712344  | 128,342,626 | T   | G | 0.168 | 1.48 | 1.29 | 1.7  | 1.35E-08 |
| 10 | rs142752112 | 51,468,284  | T   | G | 0.393 | 1.38 | 1.23 | 1.54 | 3.55E-08 |
| 10 | rs2926494   | 51,517,356  | T   | C | 0.492 | 1.31 | 1.19 | 1.44 | 3.59E-08 |
| 10 | rs2611508   | 51,518,047  | T   | A | 0.492 | 1.3  | 1.19 | 1.43 | 4.15E-08 |
| 10 | rs35094615  | 51,518,083  | TA  | T | 0.493 | 1.3  | 1.19 | 1.43 | 4.35E-08 |
| 10 | rs2843547   | 51,519,358  | A   | G | 0.49  | 1.31 | 1.19 | 1.44 | 3.31E-08 |
| 10 | rs3101227   | 51,520,203  | C   | A | 0.489 | 1.31 | 1.19 | 1.44 | 3.20E-08 |
| 10 | kgp10578928 | 51,521,247  | C   | A | 0.488 | 1.31 | 1.19 | 1.45 | 2.25E-08 |
| 10 | rs2843550   | 51,521,452  | C   | T | 0.488 | 1.31 | 1.19 | 1.44 | 2.67E-08 |
| 10 | rs2843551   | 51,521,945  | C   | A | 0.488 | 1.31 | 1.19 | 1.44 | 3.02E-08 |
| 10 | rs7088225   | 51,522,120  | C   | T | 0.487 | 1.31 | 1.19 | 1.44 | 3.79E-08 |
| 10 | rs7077830   | 51,522,276  | G   | C | 0.487 | 1.31 | 1.19 | 1.44 | 3.78E-08 |
| 10 | rs2843554   | 51,523,861  | G   | T | 0.488 | 1.31 | 1.19 | 1.44 | 3.17E-08 |
| 10 | rs2611489   | 51,524,889  | G   | A | 0.488 | 1.31 | 1.19 | 1.44 | 2.89E-08 |
| 10 | rs4935162   | 51,525,699  | G   | C | 0.488 | 1.31 | 1.19 | 1.44 | 2.89E-08 |
| 10 | rs7081532   | 51,526,093  | A   | G | 0.488 | 1.31 | 1.19 | 1.44 | 3.12E-08 |
| 10 | rs7915602   | 51,528,656  | A   | G | 0.484 | 1.31 | 1.19 | 1.44 | 3.77E-08 |
| 10 | rs7896437   | 51,529,593  | A   | C | 0.484 | 1.31 | 1.19 | 1.44 | 4.12E-08 |
| 10 | rs4486572   | 51,531,805  | A   | G | 0.489 | 1.31 | 1.19 | 1.45 | 2.40E-08 |
| 10 | rs4581397   | 51,532,367  | A   | G | 0.489 | 1.31 | 1.19 | 1.44 | 2.51E-08 |

|    |             |            |           |   |        |      |      |      |          |
|----|-------------|------------|-----------|---|--------|------|------|------|----------|
| 10 | rs10763536  | 51,535,801 | G         | A | 0.49   | 1.32 | 1.2  | 1.45 | 1.97E-08 |
| 10 | rs7911198   | 51,537,475 | A         | G | -59.49 | 1.31 | 1.19 | 1.44 | 2.54E-08 |
| 10 | rs10763567  | 51,538,169 | A         | T | 0.489  | 1.31 | 1.19 | 1.44 | 2.99E-08 |
| 10 | rs11006274  | 51,540,291 | T         | C | 0.49   | 1.31 | 1.19 | 1.44 | 2.54E-08 |
| 10 | rs4512771   | 51,540,906 | C         | A | 0.49   | 1.31 | 1.19 | 1.45 | 2.61E-08 |
| 10 | rs4631830   | 51,543,344 | C         | T | 0.465  | 1.31 | 1.19 | 1.44 | 4.88E-08 |
| 10 | rs7098889   | 51,544,475 | C         | T | 0.496  | 1.32 | 1.19 | 1.45 | 2.35E-08 |
| 10 | rs142854067 | 51,544,680 | CAAA<br>T | C | 0.498  | 1.32 | 1.2  | 1.45 | 2.38E-08 |
| 10 | rs11006462  | 51,545,813 | G         | A | 0.495  | 1.32 | 1.2  | 1.45 | 2.17E-08 |
| 11 | rs7930375   | 68,972,657 | C         | G | 0.46   | 1.39 | 1.26 | 1.53 | 3.93E-11 |
| 11 | rs7945442   | 68,972,747 | T         | C | 0.355  | 1.34 | 1.22 | 1.49 | 7.30E-09 |
| 11 | rs9783278   | 68,972,975 | A         | C | 0.355  | 1.34 | 1.22 | 1.49 | 7.54E-09 |
| 11 | rs9783279   | 68,972,992 | A         | C | 0.355  | 1.34 | 1.21 | 1.48 | 9.43E-09 |
| 11 | rs9783280   | 68,973,036 | A         | G | 0.355  | 1.34 | 1.22 | 1.49 | 7.58E-09 |
| 11 | rs4255548   | 68,973,970 | A         | G | 0.351  | 1.34 | 1.22 | 1.49 | 6.55E-09 |
| 11 | rs12793009  | 68,974,355 | C         | T | 0.352  | 1.35 | 1.22 | 1.49 | 3.49E-09 |
| 11 | rs7926098   | 68,975,524 | T         | C | 0.365  | 1.33 | 1.2  | 1.47 | 2.84E-08 |
| 11 | rs4495900   | 68,976,119 | T         | C | 0.35   | 1.35 | 1.22 | 1.49 | 3.38E-09 |
| 11 | rs4620729   | 68,980,335 | C         | A | 0.457  | 1.38 | 1.26 | 1.52 | 5.74E-11 |
| 11 | rs4930668   | 68,980,828 | T         | G | 0.351  | 1.35 | 1.22 | 1.49 | 4.23E-09 |
| 11 | rs10896447  | 68,980,875 | C         | A | 0.351  | 1.35 | 1.22 | 1.49 | 4.26E-09 |
| 11 | rs4265599   | 68,981,066 | T         | A | 0.351  | 1.35 | 1.22 | 1.49 | 4.42E-09 |
| 11 | rs12275055  | 68,981,359 | G         | A | 0.195  | 1.42 | 1.25 | 1.6  | 4.82E-08 |
| 11 | rs4451736   | 68,982,703 | A         | G | 0.45   | 1.38 | 1.26 | 1.53 | 4.91E-11 |
| 11 | kgp3232870  | 68,983,561 | A         | C | 0.45   | 1.38 | 1.25 | 1.52 | 5.79E-11 |

|    |             |            |    |    |       |      |      |      |          |
|----|-------------|------------|----|----|-------|------|------|------|----------|
| 11 | rs7939803   | 68,983,700 | T  | C  | 0.45  | 1.38 | 1.26 | 1.52 | 5.18E-11 |
| 11 | rs10792032  | 68,984,602 | G  | A  | 0.461 | 1.38 | 1.25 | 1.52 | 1.34E-10 |
| 11 | rs11421935  | 68,984,743 | A  | AG | 0.45  | 1.38 | 1.25 | 1.52 | 6.57E-11 |
| 11 | rs11351679  | 68,985,480 | GT | G  | 0.467 | 1.37 | 1.24 | 1.51 | 1.88E-10 |
| 11 | rs7929962   | 68,985,583 | C  | T  | 0.457 | 1.37 | 1.24 | 1.51 | 1.99E-10 |
| 11 | rs12790802  | 68,986,495 | A  | C  | 0.451 | 1.38 | 1.25 | 1.52 | 6.53E-11 |
| 11 | rs10792033  | 68,989,198 | G  | A  | 0.45  | 1.38 | 1.25 | 1.52 | 5.87E-11 |
| 11 | rs7121816   | 68,990,295 | T  | G  | 0.457 | 1.37 | 1.24 | 1.51 | 1.79E-10 |
| 11 | rs7109672   | 68,991,110 | A  | G  | 0.449 | 1.38 | 1.25 | 1.52 | 9.32E-11 |
| 11 | rs10896448  | 68,991,749 | G  | C  | 0.458 | 1.38 | 1.25 | 1.52 | 1.08E-10 |
| 11 | rs12795301  | 68,992,285 | A  | C  | 0.195 | 1.42 | 1.25 | 1.6  | 4.25E-08 |
| 11 | rs7122190   | 68,993,788 | C  | T  | 0.451 | 1.38 | 1.25 | 1.52 | 9.58E-11 |
| 11 | rs6591374   | 68,993,832 | A  | G  | 0.457 | 1.37 | 1.24 | 1.51 | 2.33E-10 |
| 11 | rs7931342   | 68,994,497 | T  | G  | 0.451 | 1.38 | 1.25 | 1.52 | 1.00E-10 |
| 11 | rs10896449  | 68,994,667 | A  | G  | 0.457 | 1.37 | 1.24 | 1.51 | 2.42E-10 |
| 11 | rs12362678  | 68,996,170 | C  | G  | 0.451 | 1.38 | 1.25 | 1.52 | 9.96E-11 |
| 11 | rs9787877   | 68,996,509 | T  | C  | 0.457 | 1.37 | 1.24 | 1.51 | 2.42E-10 |
| 11 | rs4644650   | 68,998,118 | T  | C  | 0.449 | 1.38 | 1.25 | 1.52 | 8.33E-11 |
| 11 | rs201557676 | 68,998,187 | TA | T  | 0.457 | 1.38 | 1.25 | 1.52 | 1.21E-10 |
| 11 | rs5792472   | 68,998,188 | AG | A  | 0.457 | 1.38 | 1.25 | 1.52 | 1.21E-10 |
| 11 | rs4569015   | 68,998,405 | T  | C  | 0.449 | 1.38 | 1.25 | 1.52 | 8.33E-11 |
| 11 | rs7950547   | 68,998,788 | T  | C  | 0.351 | 1.33 | 1.21 | 1.47 | 1.75E-08 |
| 11 | rs7925434   | 69,002,632 | T  | A  | 0.35  | 1.33 | 1.21 | 1.47 | 1.79E-08 |
| 11 | rs7939250   | 69,002,950 | G  | A  | 0.457 | 1.38 | 1.25 | 1.52 | 1.15E-10 |
| 11 | rs12788188  | 69,003,581 | T  | A  | 0.458 | 1.38 | 1.25 | 1.52 | 1.20E-10 |

|    |                      |            |   |    |       |      |      |      |          |
|----|----------------------|------------|---|----|-------|------|------|------|----------|
| 11 | rs7106762            | 69,003,706 | T | C  | 0.456 | 1.37 | 1.24 | 1.51 | 1.96E-10 |
| 11 | rs9667638            | 69,004,339 | T | A  | 0.457 | 1.38 | 1.25 | 1.52 | 1.15E-10 |
| 11 | rs7947353            | 69,004,983 | G | A  | 0.456 | 1.38 | 1.25 | 1.52 | 1.02E-10 |
| 11 | rs10896450           | 69,008,114 | A | G  | 0.456 | 1.37 | 1.24 | 1.51 | 1.86E-10 |
| 11 | rs11228583           | 69,009,114 | G | T  | 0.457 | 1.38 | 1.25 | 1.52 | 1.09E-10 |
| 11 | rs12293259           | 69,010,238 | T | G  | 0.457 | 1.38 | 1.25 | 1.52 | 9.41E-11 |
| 11 | kgp3981922           | 69,010,651 | T | G  | 0.457 | 1.38 | 1.25 | 1.52 | 8.44E-11 |
| 11 | chr11:69011692<br>:l | 69,011,692 | G | GT | 0.454 | 1.4  | 1.27 | 1.54 | 2.57E-11 |
| 11 | rs71858850           | 69,011,693 | A | AT | 0.454 | 1.4  | 1.27 | 1.54 | 2.57E-11 |
| 11 | rs199556390          | 69,011,694 | T | TG | 0.456 | 1.39 | 1.26 | 1.54 | 3.07E-11 |
| 11 | rs12270641           | 69,012,244 | T | A  | 0.45  | 1.4  | 1.27 | 1.55 | 1.42E-11 |
| 17 | rs2005705            | 36,096,300 | A | G  | 0.415 | 1.33 | 1.21 | 1.47 | 1.25E-08 |
| 17 | rs11263761           | 36,097,775 | G | A  | 0.441 | 1.34 | 1.22 | 1.48 | 4.89E-09 |
| 17 | rs11651755           | 36,099,840 | C | T  | 0.446 | 1.34 | 1.22 | 1.48 | 2.95E-09 |
| 17 | rs10908278           | 36,099,952 | T | A  | 0.442 | 1.35 | 1.22 | 1.49 | 1.67E-09 |
| 17 | kgp203119            | 36,101,586 | A | C  | 0.434 | 1.37 | 1.24 | 1.51 | 3.06E-10 |
| 17 | rs12601991           | 36,101,633 | T | G  | 0.456 | 1.32 | 1.2  | 1.45 | 2.28E-08 |
| 17 | kgp8074160           | 36,101,926 | A | G  | 0.458 | 1.32 | 1.2  | 1.45 | 2.32E-08 |
| 17 | kgp410234            | 36,102,035 | C | G  | 0.458 | 1.32 | 1.2  | 1.46 | 1.49E-08 |
| 17 | rs11651052           | 36,102,381 | A | G  | 0.435 | 1.37 | 1.24 | 1.51 | 2.49E-10 |
| 17 | rs757209             | 36,102,833 | A | G  | 0.453 | 1.31 | 1.19 | 1.45 | 4.73E-08 |
| 17 | rs11263763           | 36,103,565 | G | A  | 0.437 | 1.36 | 1.24 | 1.5  | 5.04E-10 |

**Supplemental Figure 1.** The figure depicts the first two eigenvectors (the first eigenvector is labeled EV1 and the second eigenvector is labeled EV2) of a principal components analysis by site for cases and controls. For each site appearing in the plot, cyan dots represent controls, magenta dots represent cases, and gray dots represent subjects from the other sites. Three sites that contributed only cases were merged with other sites with similar genetic background. Specifically, data from Michigan site was merged with FHCRC site, JHU site was merged with Northwestern site, and LSU site was merged with Mayo site.

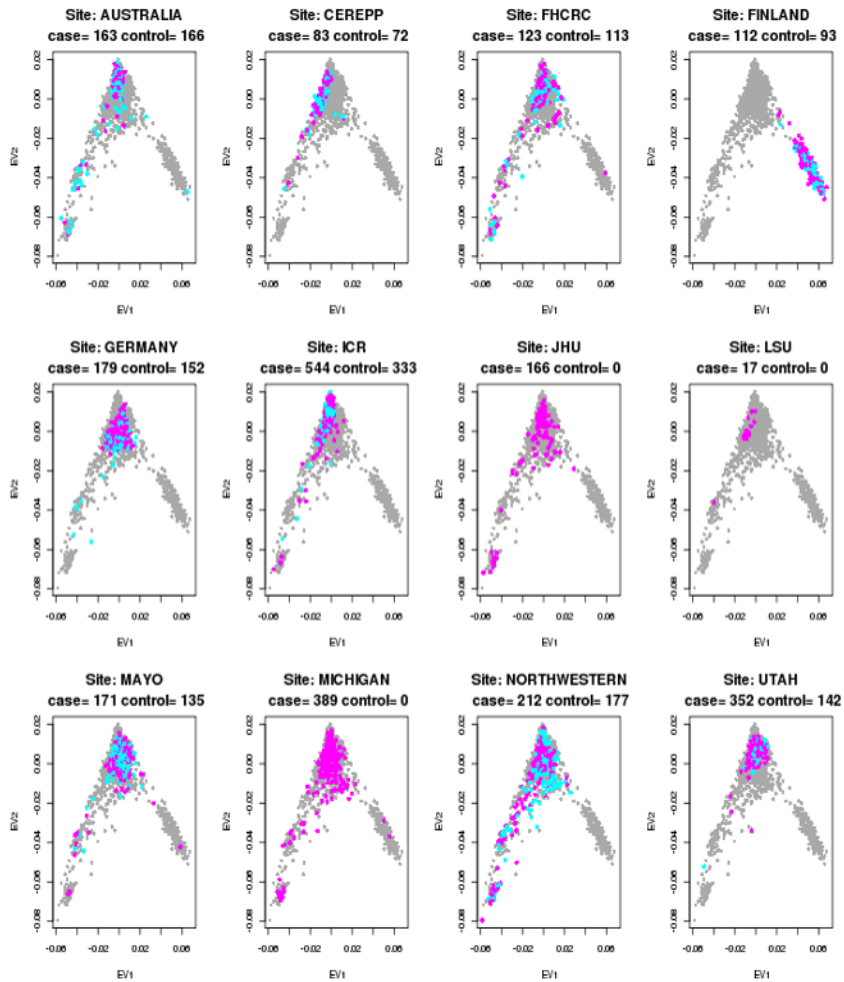

**Supplemental Figure 2.** Forest plots showing odds ratios (blue boxes) and 95% confidence intervals (blue lines) for SNPs previously associated with prostate cancer, and the estimated odds ratios (red boxes) and 95 percent confidence intervals (red lines) from the set of familial prostate cancer cases. Cytogenetic band designations appear next to SNP names. Previously reported odds ratios are summarized in Al Olama, et al., 2014, except rs138042437 which was reported in Gudmundsson, et al., 2012. In order to improve scale, two SNPs appear with clipped intervals depicted. For SNP rs138213197 (17q21), the upper 95% CI boundary is 8.5. For SNP rs138042437, the estimated odds ratio occurs at 13.3 and the 95% CI is [5.3, 32.7].

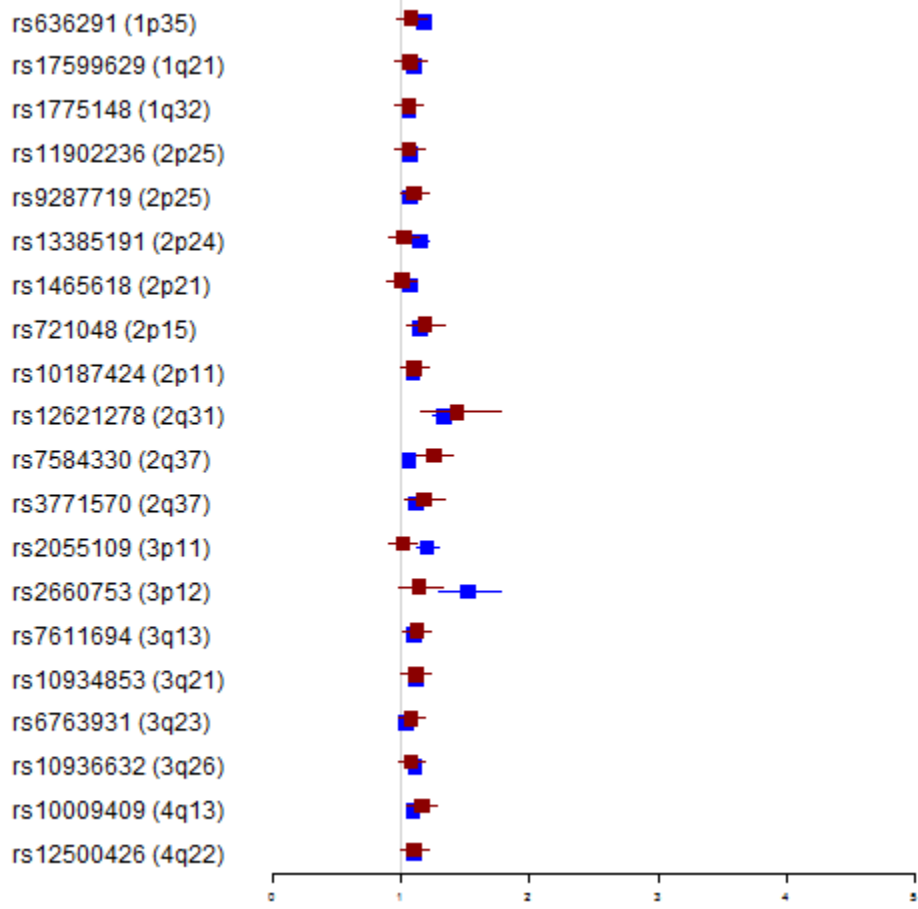



rs17021918 (4q22)  
rs7679673 (4q24)  
rs2242652 (5p15)  
rs2853676 (5p15)  
rs2736107 (5p15)  
rs12653946 (5p15)  
rs2121875 (5p12)  
rs6869841 (5q35)  
rs4713266 (6p24)  
rs7767188 (6p22)  
rs3096702 (6p21)  
rs3129859 (6p21)  
rs1983891 (6p21)  
rs9443189 (6q14)  
rs2273669 (6q21)  
rs339331 (6q22)  
rs1933488 (6q25)  
rs9364554 (6q25)  
rs12155172 (7p15)  
rs10486567 (7p15)

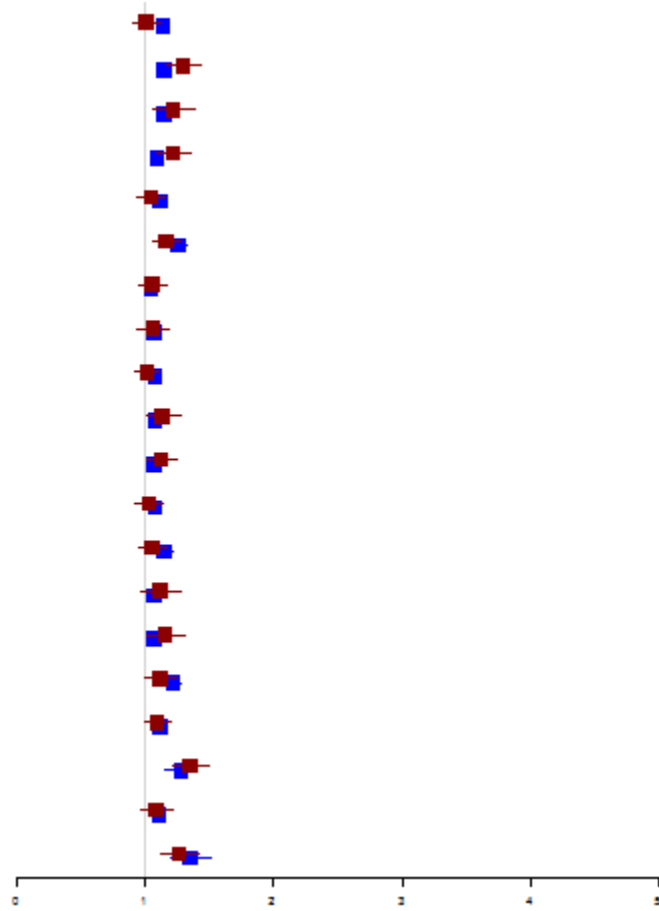

rs56232506 (7p12)  
rs6465657 (7q21)  
rs2928679 (8p21)  
rs1512268 (8p21)  
rs11135910 (8p21)  
rs12543663 (8q24)  
rs10086908 (8q24)  
rs16901979 (8q24)  
rs138042437 (8q24)  
rs6983267 (8q24)  
rs1447295 (8q24)  
rs17694493 (9p21)  
rs817826 (9q31)  
rs10993994 (10q11)  
rs3850699 (10q24)  
rs2252004 (10q26)  
rs4962416 (10q26)  
rs7127900 (11p15)  
rs1938781 (11q12)  
rs7931342 (11q13)  
rs11568818 (11q22)

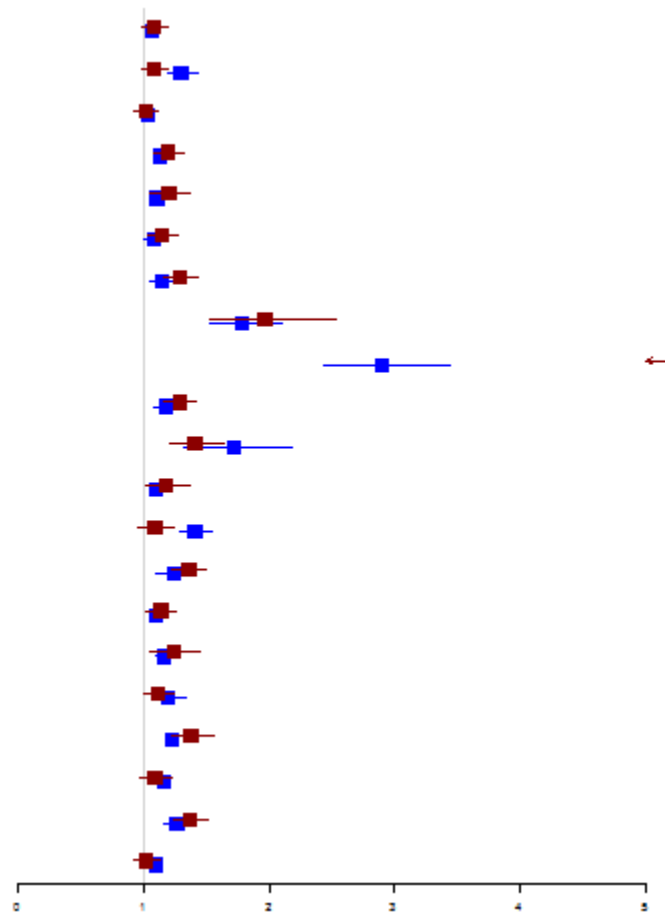

rs11214775 (11q23)  
rs80130819 (12q13)  
rs10875943 (12q13)  
rs902774 (12q13)  
rs1270884 (12q24)  
rs9600079 (13q22)  
rs8008270 (14q22)  
rs7153648 (14q23)  
rs7141529 (14q24)  
rs8014671 (14q24)  
rs12051443 (16q22)  
rs684232 (17p13)  
rs11649743 (17q12)  
rs4430796 (17q12)  
rs138213197 (17q21)  
rs1859962 (17q24)  
rs7241993 (18q23)  
rs8102476 (19q13)  
rs11672691 (19q13)  
rs103294 (19q13)

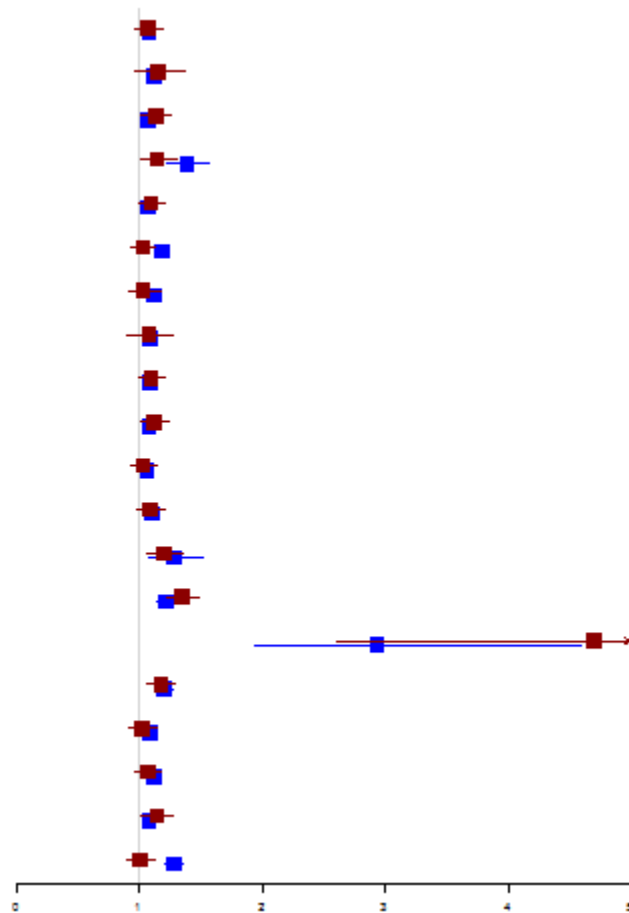

rs12480328 (20q13)  
rs2427345 (20q13)  
rs6062509 (20q13)  
rs2238776 (22q11)  
rs9623117 (22q13)  
rs5759167 (22q13)  
rs2405942 (Xp22)  
rs5945619 (Xp11)  
rs2807031 (Xp11)  
rs6625711 (Xq13)  
rs4844289 (Xq13)

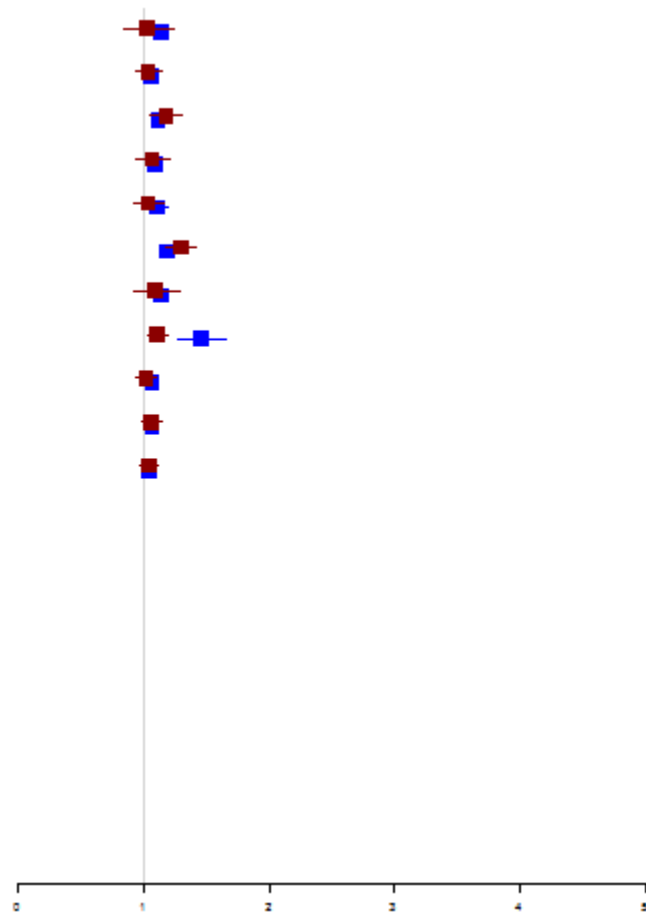

Supplement: NIHMS814106-supplement-01.pdf [file NIHMS814106-supplement-01.pdf]
